# Supplementary material
Source: PubMed Central journal article supplement (PMC2736010)
Supplement: pp.109.143297_1.pdf [file pp.109.143297_1.pdf]

Identities: 577 of 817 nucleotides (71%), gaps: 8 of 817 nucleotides (1%).

```
VChR1 254 TATGCGTACCAGGCATGGCGAGCGACGTGCGGGTGGGAGGAGGTTTATGTGGCATTGATT 313
      ||||| ||| | | ||| || | || ||||| ||||| ||||| ||||| | | |
VChR2 238 TATGCATACGCGACCTGGAGAACCACCTGCGGCTGGGAGGAGGTATATGTGTGCTGCGTC 297

VChR1 314 GAGATGATGAAGAGTATTATCGAGGCCTTTCACGAATTCGATTACCTGCGACTCTGTGG 373
      ||| ||| ||| | ||||| || ||||| || || ||| | | |||||
VChR2 298 GAGTTGACCAAGGTCGTGATCGAGTTCTTCCACGAGTTTGACGAGCCCGGCATGCTGTAC 357

VChR1 374 CTATCTAGCGGAAACGGGGTGTCTGGATGCGATACGGCGAATGGTTGCTTACATGCCCG 433
      || | | ||| ||| | | | ||| ||||| ||||| ||||| |||||
VChR2 358 CTTGCGAACGGCAACCGAGTGTGCTGCGGTACGGCGAGTGGTTGCTGACCTGCCCC 417

VChR1 434 GTGCTCCTGATCCACTTGTCAAATTTAACTGGGCTCAAAGATGATTACAGCAAGCGGACA 493
      || | || ||||| ||||| ||||| ||||| || || ||| |||||
VChR2 418 GTCATTCTCATCCACTTGTCCAATTTGACTGGCCTCAAGGACGACTACAACAAGCGGACC 477

VChR1 494 ATGGGTTTGCTCGTCTCCGATGTCCGATGCATCGTATGGGGTGCCACATCCGCCATGTGT 553
      ||| | ||||| ||||| ||||| ||||| ||||| || | |||||
VChR2 478 ATGCGGTTGCTTGTCTCCGATGTCCGGACCATCGTGTGGGGTGCTACTGCGGCCATGTCC 537

VChR1 554 ACGGGATGGACCAAGATCCTGTCTTCTTCTTATCTCACTTTC--TTACGGCATGTACACGT 611
      || || | | || | ||||| || || || | ||||| |||||
VChR2 538 ACTGGCTACATAAAAGTGATTTTCTTCT--CTCGGTTGCATGTACGGCGCAAACACAT 595

VChR1 612 ACTTCCACGCCGCCAAGGTTTACATCGAGGCATTTACACGCTGCCCAAGGGCATCTGCC 671
      ||||| ||||| || || ||| | | ||||| || ||||| || |||
VChR2 596 TCTTCCACGCCGCCAAGGTGTATATTGAGTCTGACACACCGTCCCAAGGGTCTGTGTC 655

VChR1 672 GTGAGCTGGTGGGGTTCATGGCATGGACCTTTTTCGTCGCGTGGGGCATGTTCCCGTGC 731
      || ||||| || | ||||| || || ||||| | ||||| ||||| |||||
VChR2 656 GTCAGCTGGTCCGCGCCATGGCCTGGCTGTTCTTCGTGTCATGGGGATGTTTCCCGTAC 715

VChR1 732 TCTTCTTACTGGGAAC TGAGGGATTCGGCCACATTTCAACC--TTATGGTTCGGCCATCGG 789
      | ||| | ||||| ||||| ||||| ||||| || || || || |||||
VChR2 716 TGTTCCTGTTGGGGCCCGAGGGCTTCGG--ACATCTGAGCGTCTACGGGTCAACAATCGG 773

VChR1 790 CCATTCCATATTAGACTTGATCGCAAAGAACATGTGGGGTGTCTCGGCAACTACCTGCG 849
      || |||| | || | || | ||||| ||||| || || || || |||||
VChR2 774 TCACACCATTATCGACCTTCTCTCCAAGAAGTGTGGGGTCTGCTGGGCCACTTCTCCG 833

VChR1 850 TGTCAAGATCCACGAGCACATCCTGTTGTACGGCGATATACGGAAGAAGCAGAAGATCAC 909
      | ||||| ||||| ||||| || || ||||| || || || |||||
VChR2 834 CCTGAAGATTCACGAGCACATTCGTGCTGTATGGCGATATCCGCAAGGTTCAGAAGATCAG 893

VChR1 910 CATCGCAGGCCAGGAGATGGAGGTGGAGACTCTTGTGGCCGAAGAGGAGGACGACACGCT 969
      | || | ||||| ||||| ||||| || || | || ||||| |||||
VChR2 894 GGTGGCCGGTGGAGAGCTGGAGGTGGAGACCCTCATGACGGAGGAGGCCCCCGACACCGT 953

VChR1 970 CAAACAGTCGACTGCCAAGTATGCATCTCGTGACTCGTTCATCACCATGCGCAATCGTAT 1029
      ||| |||| ||||| ||||| || | || || || ||||| || |||
VChR2 954 CAAGAAGTCCACTGCGCAGTACGCCAACAGGGAGTCTTCTTGACCATGCGTGATAAGCT 1013

VChR1 1030 GCGGGAGAAGGGCTTGGAGGTGCGGGCCTCACTGGAT 1066
      ||||| || || ||||| || || |||||
VChR2 1014 CAAGGAGAGGGTTTCGAAGTGCCTGCTTCGCTGGAT 1050
```

Identities: 259 of 351 nucleotides (74%), gaps: 10 of 351 nucleotides (3%).

```
Vchr1 1205 CCGGGCCGGGTTATCCTGGCCGTTCCGGACATTTCCATGGTTCGACTTTTTCAGAGAACAG 1264
      || ||||| || ||||| ||||| || || ||||| ||||| ||||| ||||| || |||||
Vchr2 1231 CCCGGCCCGTCATCCTAGCCGTACCTGATATTTCCATGGTGGACTATTTTCAGGGAGCAG 1290
      || ||||| ||||| ||||| ||||| ||||| ||||| ||||| ||||| ||||| |||||
Vchr1 1265 TTCGCGCAGCTGCCCGTGCCGTACGAAGTCGTACCCGCCCTTGGCGCCGAGAATACCGTA 1324
      || ||||| ||||| ||||| ||||| ||||| ||||| ||||| ||||| ||||| |||||
Vchr2 1291 TTTGCGCAGCTGCCCGTGCCGTACGAAGTCGTACCCGCCCTGCGCGCCGACAATGCCGTA 1350
      || ||||| ||||| ||||| ||||| ||||| ||||| ||||| ||||| ||||| |||||
Vchr1 1325 CAGCTGGTACAGCAGGCTGCGATGTTGGCGGGCTGCGACTTTGTGCTGATGCACCCGGAG 1384
      || || ||||| || ||||| || ||||| || ||||| || ||||| || ||||| || |||||
Vchr2 1351 CAGCTGTTGTACAGGCTGCTGGGCTGGGCGGCTGCGACTTTGTACTCCTACATCCGGAG 1410
      || || ||||| || ||||| || ||||| || ||||| || ||||| || ||||| || |||||
Vchr1 1385 TTCTTGCGTGAC----CGCGGACCCACGGGTCTGCT-GCCACAGGTCAAAATGATGGGTC 1439
      || || ||||| || ||||| || ||||| || ||||| || ||||| || ||||| || |||||
Vchr2 1411 TTTCTCCGTGACAAGTCTTCCACCAGCTTGCCCTGCTCGGCTGCGGTC-----CATAGGGC 1465
      || || ||||| || ||||| || ||||| || ||||| || ||||| || ||||| || |||||
Vchr1 1440 AGCGTACGGCAGCGTTCGGATGGTCTCAGATGGGCCCATGCGCGACCTCATTTGAGAGCT 1499
      || || ||||| ||||| ||||| ||||| || ||||| ||||| ||||| ||||| |||||
Vchr2 1466 AGCGTGTGGCAGCATTCGGCTGGTCCCCCGTTGGCCCTGTGCGTGATCTCATTGAATCCG 1525
      || || ||||| ||||| ||||| ||||| ||||| ||||| ||||| ||||| |||||
Vchr1 1500 CTGGTGTGGCGCCCTGGCTTGAGGGGCCAGCTTCGGCTCCGGAATCAGCC 1550
      || || ||||| ||||| ||||| ||||| ||||| ||||| ||||| ||||| |||||
Vchr2 1526 CTGGCCTGGATGGCTGGCTGGAGGGGCCAGTTTGGATTGGGCATTAGCC 1576
      || || ||||| ||||| ||||| ||||| ||||| ||||| ||||| ||||| |||||
```

**Supplemental Figure S1.** Nucleotide sequence alignment of the *VChr1* and *VChr2* coding sequences. BLASTn result (basic local alignment search tool, nucleotide) using the National Center for Biotechnology Information (NCBI) databases. Numbers on both sides of the sequence alignment correspond to nucleotide numbering of *VChr1* (Acc. No. EU285658) and *VChr2* (Acc. No. EU285660) coding sequences.

Identities: 1004 of 1432 nucleotides (70%), gaps: 48 of 1432 nucleotides (3%).

|              |      |                                                                |      |
|--------------|------|----------------------------------------------------------------|------|
| <b>VChR1</b> | 260  | TACCAGGCATGGCGAGCGACGTGCGGGTGGGAGGAGGTTTATGTGGCATTGATTGAGATG   | 319  |
|              |      |                                                                |      |
| <b>ChR1</b>  | 419  | TACCAGACCTGGAAGTCTACTTTCGCGGCTGGGAGGAGATTTACGTGGCCACGATCGAGATG | 478  |
| <b>VChR1</b> | 320  | ATGAAGAGTATTATCGAGGCTTTTCACGAATTCGATTCACCTGCGACTCTGTGGCTATCT   | 379  |
|              |      |                                                                |      |
| <b>ChR1</b>  | 479  | ATCAAGTTCATCATCGAGTATTTCATGAGTTTGACGAACCTGCGGTGATCTACTCATCC    | 538  |
| <b>VChR1</b> | 380  | AGCGSAAACGGGGTTGTCTGGATGCGATACGGCGAATGTTGCTTACATGCCCGGTGCTC    | 439  |
|              |      |                                                                |      |
| <b>ChR1</b>  | 539  | AACGGCAACAAGACCGTGTGGCTTCGTTACGCGGAGTGGCTGCTGACCTGCCCTGTGATT   | 598  |
| <b>VChR1</b> | 440  | CTGATCCACTTGTCAAATTTAACTGGGCTCAAAGATGATTACAGCAAAGCGGACAAATGGGT | 499  |
|              |      |                                                                |      |
| <b>ChR1</b>  | 599  | CTTATCCATCTGAGCAACCTTACGGGCTGGCGAACGACTATAACAAGCGTACCATGGGT    | 658  |
| <b>VChR1</b> | 500  | TTGCTCGTCTCCGATGTCGGATGCATCGTATGGGGTGCCACATCCGCCATGTGTACGGGA   | 559  |
|              |      |                                                                |      |
| <b>ChR1</b>  | 659  | CTGCTGGTGTGAGATATCGGCACGATCGTGTGGGGCACCCACGGCCGCGCTGTCCAAGGGA  | 718  |
| <b>VChR1</b> | 560  | TG-GACCAAGATCCTGTTCTTCTTATCTCACTTTCTTACGGCATGTACACGTACTTCCA    | 618  |
|              |      |                                                                |      |
| <b>ChR1</b>  | 719  | TACGTCCGTG-TCATTTCTTCTCTGATGGGCCTGTGCTACGGCATCTACACATTCITCAA   | 777  |
| <b>VChR1</b> | 619  | CGCCGCAAGGTTTACATCGAGGCATTTTACACGGTGCCCAAGGGCATTCTGCCGTGAGCT   | 678  |
|              |      |                                                                |      |
| <b>ChR1</b>  | 778  | CGCAGCCAAGGTCTACATGAGGCGTACCACACCCTGCCCAAGGGCATTTGCGCGCACCT    | 837  |
| <b>VChR1</b> | 679  | GGTGGGGTTCATGGCATTGACCTTTTTTCGTCGCGTGGGGCATGTTCCCGTGCTCTTCTT   | 738  |
|              |      |                                                                |      |
| <b>ChR1</b>  | 838  | GGTCCGCTACCTTGCCCTGCTACTTCTGTTTCATGGGGCTATGTTCCCGTGCTGTCTCT    | 897  |
| <b>VChR1</b> | 739  | ACTGGGAACGTGAGGATTTCGGCCACATTTTACCTTATGTT--TCGGCCATCGGCCATTCC  | 796  |
|              |      |                                                                |      |
| <b>ChR1</b>  | 898  | GCTGGGCCCCGAGGGCTTTGGCCACAT--CAACCAATTCAACTCTGCCATCGCCACGCC    | 955  |
| <b>VChR1</b> | 797  | ATATTAGACTTGATCGCAAAGAACATGTGGGGTGTCTCGGCCAACTACCTGCGTGTCAAG   | 856  |
|              |      |                                                                |      |
| <b>ChR1</b>  | 956  | ATCCTGGACCTTGCCCTCAAGAACGCTTTGAGTATGATGGGTCACTTCTGCGTGTCAAG    | 1015 |
| <b>VChR1</b> | 857  | ATCCACGAGCACATCCTGTTGTACGGCGATATACTGGAAGAAGCAGAAGATCACCATCGCA  | 916  |
|              |      |                                                                |      |
| <b>ChR1</b>  | 1016 | ATCCACGAGCACATCCTGCTGTACGGCGACATCCGCAAGAAGCAGAAGGTCAACGTGGCT   | 1075 |
| <b>VChR1</b> | 917  | GGCCAGGAGATGGAGGTGGAGACTCTTGTGGCCGAAGAGGAGGACGACACGGTCAAACAG   | 976  |
|              |      |                                                                |      |
| <b>ChR1</b>  | 1076 | GGCCAGGAGATGGAGGTGGAGACCATTGGTGCACGAGGAGGACGACGAGACGACGAGAAGTG | 1135 |
| <b>VChR1</b> | 977  | TCGACTGCCAAGTATGCATCTCGTACTCGTTTCATCACCATGCGCAATCGTATGCGGGAG   | 1036 |
|              |      |                                                                |      |
| <b>ChR1</b>  | 1136 | CCCACGGCAAAAGTACGCCAACCGGACTCGTTTCATCATCATGCGCGACCCCTCAAGGAG   | 1195 |
| <b>VChR1</b> | 1037 | AAGGGCTTGGAGGTGCGGGCTCACTGGATGCCGGTGGTGGCGACAGCGGTATGGAGGCC    | 1096 |
|              |      |                                                                |      |
| <b>ChR1</b>  | 1196 | AAGGGCTTCGAGACCCGCGCTCGTGGG-----CGGCAC--CCGAACGG--CGAC         | 1243 |

```

VChR1 1097 GCGGGTGGCGGGCCGACACGCCCAAACCACACATGGCAAAGCCCGGCACGGAACCTGGGC 1156
| | | | | | | | | | | | | | | | | | | | | | | | | | | | | | | | | |
ChR1 1244 GCCGAGGCCAACGCTGCAGCCGGC-----GGC-AAGCCCGGAATGGAGATGGGC 1291

VChR1 1157 AAGACGATGTCGGCCA---GCTTTACAAACGGAGCCGCCA-----CAAGCTTGGAG 1204
| | | | | | | | | | | | | | | | | | | | | | | | | | | | | | | | | |
ChR1 1292 AA---GATGACCGGCATGGGCATGAGCATGGGTGCCGGCATGGGCATGGCGAACATCGAT 1348

VChR1 1205 CCGGGCCGGTTATCCTGGCCGTCCGGACATTTCCATGGTCGACTTTTCAGAGAACAG 1264
| | | | | | | | | | | | | | | | | | | | | | | | | | | | | | | | | |
ChR1 1349 TCGGGCCGGCTCATCCTCGCCGTGCCGGACATCTCCATGGTGGACTTTTCCGGGAGCAG 1408

VChR1 1265 TTCGCGCAGCTGCCCGTGCCGTACGAAAGTCGTACCCGCCCTTGGCGCCGAGAATACCSTA 1324
| | | | | | | | | | | | | | | | | | | | | | | | | | | | | | | | | |
ChR1 1409 TTCGCGCGGCTGCCCGTGCCGTACGAAACTGGTGCCTCGCCGCTGGGCGGGAGAACACCTC 1468

VChR1 1325 CAGCTGGTACAGCAGGCTGCGATGTGGGCGGCTGCGACTTTGTGCTGATGCACCCGGAG 1384
| | | | | | | | | | | | | | | | | | | | | | | | | | | | | | | | | |
ChR1 1469 CAGCTGGTGCAGCAGGCGCAGTCACTGGGAGGCTGCGACTTCGTCCCTCATGCACCCCGAG 1528

VChR1 1385 TTCTTGCGTGACCGGGACCCACGGGTCTGCTGCCACAGGTCAAAATGATGGGTGAGCGT 1444
| | | | | | | | | | | | | | | | | | | | | | | | | | | | | | | | | |
ChR1 1529 TTCCTGCGCGACCGCAGTCCACGGGTCTGCTGCCCGCCTCAAGATGGGCGGGCAGCGC 1588

VChR1 1445 ACGGCGCGCTTCGGATGGTCTCAGATGGGCCCCATGCGCGACCTCATTGAGAGCTCTGGT 1504
| | | | | | | | | | | | | | | | | | | | | | | | | | | | | | | | | |
ChR1 1589 GCCGCGGCCTTCGGCTGGGCGGCAATCGGCCCATGCGGGACTTGATCGAGGGTTCGGGC 1648

VChR1 1505 GTTGGCGCCTGGCTTGAGGGGCCAGCTTCGGCTCCGGAATCAGCCAGGCTGCTCTCCAG 1564
| | | | | | | | | | | | | | | | | | | | | | | | | | | | | | | | | |
ChR1 1649 GTTACGGCTGGCTGGAGGGGCCAGCTTTGGCGCCGCATCAACCAGCAGGGCTGGTG 1708

VChR1 1565 CAGCTGGTGGTGAAGATGCACAGGCCAAGCGCATGGCGGCCATGGGTAGCATGATGGGT 1624
| | | | | | | | | | | | | | | | | | | | | | | | | | | | | | | | | |
ChR1 1709 GCGCTGATCAACCGCATGCAGCAGGCCAAG---AAGATGGGCATGATGGGCGGTATGGGT 1765

VChR1 1625 GCGGCATGGGCAACGGCATGGGCATGGGCATGGGTATGGGCATGGGCATGG 1676
| | | | | | | | | | | | | | | | | | | | | | | | | | | | | | | | | |
ChR1 1766 ATGGGCATGGGCGGCGCATGGGTATGGGCATGGGTATGGGCATGGGCATGG 1817

```

**Supplemental Figure S2.** Nucleotide sequence alignment of the *VChR1* and Chlamydomonas *ChR1* coding sequences. BLASTn result (basic local alignment search tool, nucleotide) using the National Center for Biotechnology Information (NCBI) databases. Numbers on both sides of the sequence alignment correspond to nucleotide numbering of *VChR1* (Acc. No. EU285658) and *ChR1* (Sineshchekov et al., 2002, Acc. No. AF508965) coding sequences.

Identities: 596 of 804 nucleotides (74%), gaps: 15 of 804 nucleotides (2%).

|              |      |                                                               |      |
|--------------|------|---------------------------------------------------------------|------|
| <i>VChr2</i> | 262  | ACCTGCGGCTGGGAGGAGGTATATGTGTGCTGCGTCGAGTTGACCAAGSTCGTGATCGAG  | 321  |
|              |      |                                                               |      |
| <i>Chr2</i>  | 262  | ACCTGCGGCTGGGAGGAGATCTATGTGTGCGCTATCGAGATGGTCAAGGTGATCTCGAG   | 321  |
| <i>VChr2</i> | 322  | TTCTTCCACGAGTTTGACGAGCCCG-GCATGCTGTACCTTGCGAACGGCAACCGAGTGCT  | 380  |
|              |      |                                                               |      |
| <i>Chr2</i>  | 322  | TTCTTCTCGAGTTT-AAGAACCCTCCATGCTGTATCTAGCCACAGGCCACCCGCTCCA    | 380  |
| <i>VChr2</i> | 381  | GTGGCTGCGGTACGGCGAGTGGTTGCTGACCTGCCCCGTCAATCTCATCCACTTGTCCAA  | 440  |
|              |      |                                                               |      |
| <i>Chr2</i>  | 381  | GTGGTTGCGTACGCCGAGTGGCTTCTCACCTGCCCCGTCAATCTCATCCACTTGTCCAA   | 440  |
| <i>VChr2</i> | 441  | TTTGACTGGCCTCAAGGACGACTACAACAAGCGGACCATGCGGTTGCTTGTCTCCGATGT  | 500  |
|              |      |                                                               |      |
| <i>Chr2</i>  | 441  | CCTGACGGGCTTGTCCAACGACTACAGCAGGCGCACCATGGGTCTGCTTGTCTGATAT    | 500  |
| <i>VChr2</i> | 501  | CGGCACCATCGTGTGGGGTGTACTGCGGCCATGTCCACTGGCTACATAAAAGTGATTTT   | 560  |
|              |      |                                                               |      |
| <i>Chr2</i>  | 501  | TGGCACAATGTGTGGGGCGCCACTTCCGCCATGGCCACCGGATACGTCAAGGTCATCTT   | 560  |
| <i>VChr2</i> | 561  | CTTCTCCTCGGT-TGCATGTACGGCGCAAACACATTCTTCCACGCCCAAGGTGTATA     | 619  |
|              |      |                                                               |      |
| <i>Chr2</i>  | 561  | CTTCTGCTGGGCTGTGT-TATGGTGCTAACACGTTCTTTCACGCTGCCAAGGCCTACA    | 619  |
| <i>VChr2</i> | 620  | TTGAGTCGTACCACACCGTCCCCAAGGGTCTGTGTGTCGTGAGTGGTCCGCGCCATGGCCT | 679  |
|              |      |                                                               |      |
| <i>Chr2</i>  | 620  | TCGAGGGTTACCACACCGTCCCGAAGGGCGGTGTGCGCCAGGTGGTACTGGCATGGCCT   | 679  |
| <i>VChr2</i> | 680  | GGCTGTTCTTCGTGTATGCGGGGATGTTTCCCGTACTGTTCTGTTGGGGCCCGAGGGCT   | 739  |
|              |      |                                                               |      |
| <i>Chr2</i>  | 680  | GGCTCTTCTTCGTATCATGGGGTATGTTCCCATCCTGTTTCATCCTCGGCCCGAGGGCT   | 739  |
| <i>VChr2</i> | 740  | TCGGACATCTGAGCGTCTACGGGTCAACAATCGGTCAACACCATATCGACCTTCTCTCCA  | 799  |
|              |      |                                                               |      |
| <i>Chr2</i>  | 740  | TCGGCGTCTGAGCGTGTACGGTCCACCGTCCGCCACACCATCATGACCTGATGTCGA     | 799  |
| <i>VChr2</i> | 800  | AGAACTGCTGGGGTCTGCTGGGCCACTTCCCTCCGCTGAAGATTCACGAGCACATCTGTC  | 859  |
|              |      |                                                               |      |
| <i>Chr2</i>  | 800  | AGAACTGCTGGGGTCTGCTGGGCCACTTCCCTCCGCTGAAGATTCACGAGCATATCCTCA  | 859  |
| <i>VChr2</i> | 860  | TGTATGGCGATATCCGCAAG--GTTTCAAG-AGATCA-GGGTGGCCGGTGGAGAGCTGGAG | 915  |
|              |      |                                                               |      |
| <i>Chr2</i>  | 860  | TCCACGGCGACATTCGCAAGACCACCAAAATTGAACATTTGGTGCC---ACTGAGATTGAG | 915  |
| <i>VChr2</i> | 916  | GTGGAGACCTCATGACGGAGGAGGCC---CCCGACACCGTCAAGAAGTCCACTGCGCAG   | 972  |
|              |      |                                                               |      |
| <i>Chr2</i>  | 916  | GTCGAGACGCTGGTGGAGGACGAGGCCGAGGCTGGCGCGGTCAACAAGGGCACCGGCAAG  | 975  |
| <i>VChr2</i> | 973  | TACGCCAACAGGGAGTCTTCTTGACCATGCGTGATAAGCTCAAGGAGAAGGGTTTCGAA   | 1032 |
|              |      |                                                               |      |
| <i>Chr2</i>  | 976  | TACGCCTCCCGGAGTCTTCTTGGTTCATGCGCGACAAGATGAAGGAGAAGGGCATTGAC   | 1035 |
| <i>VChr2</i> | 1033 | GTGCGTGTCTTCGCTGGATAACAGC                                     | 1056 |
|              |      |                                                               |      |
| <i>Chr2</i>  | 1036 | GTGCGCGCTCTCTGGACAACAGC                                       | 1059 |

Identities: 282 of 401 nucleotides (70%), gaps: 10 of 401 nucleotides (2%).

```
VChR2 1231 CCGGGCCGCGTCATCCTAGCCGTACCTGATATTTCCATGGTGGACTATTCAGGGAGCAG 1290
      ||| | | | | | | | | | | | | | | | | | | | | | | | | | | | | | | | | |
ChR2 1222 CCGGGCCGCGTCATCCTGGCGGTGCCGGACATCAGCATGGTTGACTTCTCCGCGAGCAG 1281

VChR2 1291 TTTGCGCAGCTGCCGGTGCAGTACGAAAGTCGTACCCGCGCTCGGGCCGACAATGCCGTA 1350
      ||| | | | | | | | | | | | | | | | | | | | | | | | | | | | | | | | | |
ChR2 1282 TTTGCTCAGCTATCGGTGACGTACGAGCTGGTGCCGGCCCTGGGCGCTGACAACACACTG 1341

VChR2 1351 CAGCTTGTGTACAGGCTGCTG-GGCTGGGCGGCTGCGACTTTGTACTCCTACATCCGGA 1409
      ||| | | | | | | | | | | | | | | | | | | | | | | | | | | | | | | | | |
ChR2 1342 GCGCTGTTACGCAGGC-GCAGAACCTGGGCGCGTGGACTTTGTGTTGATTCAACCCGA 1400

VChR2 1410 GTTCTCCGTGACAAGTCTTCCACCAGCTTGCCTG-CTCGGCTGCGGTCCATAGGGCAGC 1468
      ||| | | | | | | | | | | | | | | | | | | | | | | | | | | | | | | | | |
ChR2 1401 GTTCTCGCGACCGCTCTAGCACCAGCAT-CCTGAGCCGCTGCGCGGCGGGGCGCAGC 1459

VChR2 1469 GTGTGGCAGCATTCCGGCTGGTCCCCCGTTGGCCCTGTGCGTGATCTCATTGAATCCGCTG 1528
      ||| | | | | | | | | | | | | | | | | | | | | | | | | | | | | | | | | |
ChR2 1460 GTGTGGCTGCGTTCGGCTGGGCGCAGCTGGGGCCCATGCGTGACCTGATCGAGTCCGCAA 1519

VChR2 1529 GCCTGGATGGCTGGCTGGAGGGGCCAGTTTGGATTGGGCAT-TAGCCTGCC--CAACC 1585
      ||| | | | | | | | | | | | | | | | | | | | | | | | | | | | | | | | | |
ChR2 1520 ACCTGGACGGCTGGCTGGAGGGCCCTCGTTCCGGACAGGGCATCCTGCGGGCCACATCG 1579

VChR2 1586 TTGCAAGCCTGGTCCCTGCGGATGCAGCATGCGCGCAAGATG 1626
      ||| | | | | | | | | | | | | | | | | | | | | | | | | | | | | | | | | |
ChR2 1580 TTGC---CCTGGTGGCCAGATGCAGCAGATGCGCAAGATG 1617
```

**Supplemental Figure S3.** Nucleotide sequence alignment of the *VChR2* and Chlamydomonas *ChR2* coding sequences. BLASTn result (basic local alignment search tool, nucleotide) using the National Center for Biotechnology Information (NCBI) databases. Numbers on both sides of the sequence alignment correspond to nucleotide numbering of *VChR2* (Acc. No. EU285660) and *ChR2* (Sineshchekov et al., 2002, Acc. No. AF508966) coding sequences.

\* 20 \* 40 \* 60 \* 80  
 VChR1 : ----- : -  
 VChR2 : ----- : -  
 Chr1 : ---ATGTCGCGGAGGCCATGGCTTCTTGCCCTAGCGCTGGCAGTGGCGCTGGCGGCCGGCAGCGCAGGAGCCTCGACTGG : 77  
 Chr2 : ----- : -

\* 100 \* 120 \* 140 \* 160  
 VChR1 : -----ATGGATTATCCCGTT-----GCTCCGTCTTGTATGTC---AGAT : 37  
 VChR2 : -----ATGGACCCCACTT-----GCGCCGTCCTCATCGGCTCAAGTT : 40  
 Chr1 : CAGTGACGCGACGGTGCCCGTCCGCACACAGGATGCCCGACTACGTTTTCCACCCTGCCACAGCGCATGCTCTTCC : 157  
 Chr2 : -----ATGGATTATGGAGGCCCTGAGTCCCGTTGG-GGGCAGGTGCTATTGTT---ACG : 54

\* 180 \* 200 \* 220 \* 240  
 VChR1 : ATCAACTGACTCGGA-----AATGGACGGT-----TTGCATGCCGCG--GCCAGTGTATTTGGAGGGTGGT : 103  
 VChR2 : ATAC---TAACTCAT---AATGGCTCCATTGTGATTCCATCT---GACGGGTGTTTGTGCATGAATAAGG : 103  
 Chr1 : AAACTCATACACTCTTGAGAAAGATGGTCTGTAT--TTGCATCCGAAACAGGCCAGTGTCTTGTGCTGCTTGGC : 235  
 Chr2 : A-----ACACAGTAGTCGTCAATGGCTCTG--AAC--TTCTGC-----TGAGSACCAGTGTAACTGCCGGGCTTGA : 118

\* 260 \* 280 \* 300 \* 320  
 VChR1 : TGAGTAGCGGGTACAGGATTGACAAAACAATTCAATTACATTGCAATGGTCTCTTTGCTTATCCGTCGCTTGT : 183  
 VChR2 : TTAAGTCCAAGGTTACCTGTACCCTGAAATGCGCCAGCGGTACAGTGGCGGCCCTTCGTTTCTCGTCAATAACT : 183  
 Chr1 : TTAATCCAACGGACAAATCCGAGCAAGTTCGCTCCAAATTTCAGTGGATTACTTTTGGCTTTCAGCGCTCTGC : 315  
 Chr2 : TTGAGTGCCTGGTCAAACGGTCCCAAACGCGTCAAGGTGTGCAATGGCTTCTGTCTGGCTTCTCCATCTACTG : 198

\* 340 \* 360 \* 380 \* 400  
 VChR1 : CTCGGATGGTATGCGTACAGGCATGCCGAGCGACGTCCGGCTGGGAGGAGTTTATAGTGCATTGATTTGAGATGATGAA : 263  
 VChR2 : CTCATCTACTATGCATACCGGACCTTGAGAGACCACCTCGGGTGGGAGGAGGATATAGTGTGCTGCCGTGAGTTGACCA : 263  
 Chr1 : CTGATCTTCTACGGCTACCAGACCTTGAAGTCTACTTCCGGTGGGAGGAGATTTAGCTGCCCAGGTGAGATGATCAA : 395  
 Chr2 : CTTATGTTTATAGGCTACCAAACATGGAAGTCAACCTCGGGTGGGAGGAGATCTATAGTGTGCTATGAGATGTGAA : 278

\* 420 \* 440 \* 460 \* 480  
 VChR1 : CAGTATTTCGAGGCTTTTCAGGAATTCATTCACTCCGCTCTTGGGTATCTACGGACGGGGTGTCTGGATCC : 343  
 VChR2 : GGTCTGTGTCGAGTTTCCACGAGTTTGACGAGCCCGCATGCTTACCTTCGGAACGGAAACCACTGCTGCTGGCTCC : 343  
 Chr1 : GTTCTCTTCGAGTATTTCCATGAGTTGACGAACCTCGGGTGTACTCTACCAACGGAAACAGACCGCTGTGGCTTC : 475  
 Chr2 : GGTGATTTTCGAGTCTTTTCAGTTTAAAGAACCCGTCCATGCTGTATCTAGCCACAGGACACCCCTCCACGTGGTTCC : 358

\* 500 \* 520 \* 540 \* 560  
 VChR1 : GATACGGGAGATGGTTCCTTACATGCCCGTGTCTCCTGATCACTGTCAAAATTAAGTGGGTCAAAGATGATTAACGC : 423  
 VChR2 : GGTACGGGAGATGGTTCCTTACATGCCCGTGTCTCCTGATCACTGTCAAAATTAAGTGGGTCAAAGATGATTAACGC : 423  
 Chr1 : GTTACGGGAGATGGTTCCTTACATGCCCGTGTCTCCTGATCACTGTCAAAATTAAGTGGGTCAAAGATGATTAACGC : 555  
 Chr2 : CTTACGGGAGATGGTTCCTTACATGCCCGTGTCTCCTGATCACTGTCAAAATTAAGTGGGTCAAAGATGATTAACGC : 438

\* 580 \* 600 \* 620 \* 640  
 VChR1 : AAGCGGACAAATGGTCTGCTCGTCTCCGATCTCGGATGCATGATGGGGTCCACATCGCCATGTGTAAGGGTGGAC : 503  
 VChR2 : AAGCGGACAAATGGTCTGCTCGTCTCCGATCTCGGATGCATGATGGGGTCCACATCGCCATGTGTAAGGGTGGAC : 503  
 Chr1 : AAGCGTACCAATGGTCTGCTCGTCTCCGATCTCGGATGCATGATGGGGTCCACATCGCCATGTGTAAGGGTGGAC : 635  
 Chr2 : AAGCGCACCAATGGTCTGCTCGTCTCCGATCTCGGATGCATGATGGGGTCCACATCGCCATGTGTAAGGGTGGAC : 518

\* 660 \* 680 \* 700 \* 720  
 VChR1 : CAACATCTTCTTCTTCTTATCTCACITTTCTTAGGATGTACAGTACTTCCACGCGCCCAAGTTTTACATCGAGGAT : 583  
 VChR2 : AAAATGATTTTCTTCTTCTTCTCGGTTGCATGTAGGCGAACACATCTTCCACGCGCCCAAGTGTATATGAGTCT : 583  
 Chr1 : CCGTCTCATTTTCTTCTTCTGATGGCTGTGTGTAAGGATCTACACATCTTCAACGAGCCCAAGTCTAATGAGGCT : 715  
 Chr2 : CAACATCTTCTTCTTCTTCTGATGGTGTGTAAGGATCTACACATCTTCAACGAGCCCAAGTCTAATGAGGCT : 598

\* 740 \* 760 \* 780 \* 800  
 VChR1 : TTCACACGGTCCCAAGGGATCTGCCGTGAGCTGGTGGGCTCATGGCATGGACTTTTTCGTCGCTGGGGCATGTTG : 663  
 VChR2 : ACCACACGTCGCCAAGGGATCTGCCGTGAGCTGGTGGGCTCATGGCATGGACTTTTTCGTCGCTGGGGCATGTTG : 663  
 Chr1 : ACCACACGTCGCCAAGGGATTTGCCCGCACCTGGTCCCTACCTTGCCTGGGTCTACTTCTGTCTTGGCTATGTTG : 795  
 Chr2 : ACCACACGTCGCCAAGGGATCGGTGTCCGACGGTGGTACTGGCATGGCTTGGCTCTTCTCGTATCTGGGTATGTTG : 678

\* 820 \* 840 \* 860 \* 880  
 VChR1 : CCCCTGCTTCTTCTTCTTGGAACTGAGGGATTTGGGCACATTTCACTTTTGGTTCGGCCATCGGCCATTCATATAGA : 743  
 VChR2 : CCCCTACTTCTTCTTCTTGGGCGGAGGGTTGGGACATCTGAGGTCTACGGTCAACATCGGTCACACCATATTCGA : 743  
 Chr1 : CCGTCTGCTTCTTCTTCTTGGCCCGGAGGGTTTGGCCACATCAAACAATTTCAACTCTGCCATCCGCCAAGCCATCTGGA : 875  
 Chr2 : CCCATCTTCTTCTTCTTCTTGGCCCGGAGGGTTGGGCTCTGAGGTCTACGGTCTCACGCTCGGCCACACCATATAGA : 758

\* 900 \* 920 \* 940 \* 960  
 VChR1 : CTTGATCGCAAGAAGATCTGGGTGTTCTGGGAACTACCTCCCTGTCAGATCCACGAGCAATCTGTTGTAAGGGC : 823  
 VChR2 : CCTTCTTCCAAGAAGCTGGGTGTTCTGGGCACTTCTCCGCTGAGATTCACGAGCAATCTGTTGTAAGGGC : 823  
 Chr1 : CCTTCCCTCAAGAAGCTGGGATGATGAGGTTCACTTTCTCGCTCAAGATCCACGAGCAATCTGTTGTAAGGGC : 955  
 Chr2 : CTTGATCGCAAGAAGCTGGGTGTTCTGGGCACTTCTCCGCTGAGATTCACGAGCAATCTGTTGTAAGGGC : 838

VChR1 : ATATA\*CGGAAGAGCAGAAATACCATCGAGGCAGGAGTGGAGGTGGAGACTTTTGTGGCCGAAGAGGAGGAC--- : 900  
VChR2 : ATATCCGTAAGGTTCAAGAAATAGGGTGGCCGGTGAAGGAGGTGGAGGTGGAGACCCTCATGACGGAGGAGGCCCC--- : 900  
ChR1 : ACATCCGTAAGAGCAGAAAGTAACTGGTGGCCAGGAGTGGAGGTGGAGACATGGTGCACGAGGAGGACAC--- : 1032  
Chr2 : ACATTCGTAAGACCACCAATTGAACATTTGGTGGACTGAGATTGGAGTGGAGACGTTGTTGGAGGACGAGGCCGAGGCT : 918

VChR1 : GACACGGTCAACAGTCCGACTGCACAGTATGCATCTCGTGAATCGTTTCATCACCATGCGCAATCGTATGCGGGAGAAGGG : 980  
VChR2 : GACACCGTCAAGAGTCCCACTGGCAGTATGCCAACAGGGAGTCCCTTCTTTGACCATGCGGTGATAAGCTCAAGGAGAAGGG : 980  
ChR1 : GAGACCCAGAAAGGTGCCACGGAAAGTATGCCAACCGGGAGTCCCTTCTATCATCATGCGCCAGCCGCCCAAGGAGAAGGG : 1112  
Chr2 : GGGCGGGTCAACAGGGGACCCGCAAGTATGCCCTCCGGAGTCCCTTCTGGTTCATGCGCCGACAAATGAAAGGAGAAGGG : 998

VChR1 : CTTGGAGTGGCGGCTCACTGGATGCCGGTGGTGGCCACACCGCTATGGAGCCCG : 1036  
VChR2 : TTTGGAGTGGCGGCTCACTGGATGCCGGTGGTGGCCACACCGCTATGGAGCCCGTTATCAACCACAAACAACTACTA : 1048  
ChR1 : CTTGGAGTGGCGGCTCACTGGATGCCGGTGGTGGCCACACCGCTATGGAGCCCGACCGCAACCAAGCGG : 1153  
Chr2 : CATTTGACTGGCGGCTCACTGGATGCCGGTGGTGGCCACACCGCTATGGAGCCCGACCGCAACCAAGCGG : 1038

VChR1 : GCGGTGCGCGGCGCACAGCTC---CAACCACACATGGCAAAGCC---GGCACGG--- : 1087  
VChR2 : ATAACGCCCTAGCAAACCGCGCAGCAGCACTC---GGCAAGCCG---GGCAGTGCAGTCTCT : 1104  
ChR1 : AACGCCCTAGCAAACCGCTCAGCTC---GGCGCAAAGCC---GGCAATGG--- : 1195  
Chr2 : GAGCAAGAGCAAGCGCGCAGGCTGCATGATGATGATGAACGGCAATGGATGGGTATGGCAATGG--- : 1105

VChR1 : AACTGGCCAAAGCAGTGTCCGCA---GTTTCAAAACCGAGCCGCCACAAGCTTGGAG--- : 1143  
VChR2 : AAGCTCCACCAAGTCCGCGCAAGGCCCGGGCATGGCGGCTATCCGGACCATGTTGCCACCACCTGGGCGCCATCTC : 1184  
ChR1 : AGATGGCCAAAGTGT---CCGCAATGC---GATGAGCATGGCTGGCGGATGGSCAAGGCCAATCTCA : 1259  
Chr2 : GAATGAAAGGCGATGA---ACCGAATGGCGGTATGAACGGATGGCTGGCGCGCAAGCCCGCCGGAAGCTCACTCC : 1181

VChR1 : CCGGCGCGGTTATCCCTGGCGGTCCCGACATTTCCATGGTGGACTTTTCCAGAGAACAGTTCGGCCAGC : 1213  
VChR2 : CCGGCGCGGTATCCCTAGCGGTACCTGATATTTCCATGGTGGACTATTTCCAGGAGCAGATTTGCCACAGC : 1255  
ChR1 : TCGGCGCGGTATCCCTGGCGGTCCCGACATTTCCATGGTGGACTTTTCCAGGAGCAGTTCGGCCAGC : 1330  
Chr2 : GCAGCTACAGCCCGGCGGTATCCCTGGCGGTCCCGACATTTCCATGGTGGACTTTTCCAGGAGCAGTTCGGCTCAGC : 1261

VChR1 : TGGCGGTGCCGTACGAAGTGGTACCAGCCCTTGGGCGGAGAAATCCCGTACAGCTGTACAGCAGGCTGCATGTTGGGG : 1293  
VChR2 : TGGCGGTGCCGTACGAAGTGGTACCAGCCCTTGGGCGGAGAAATCCCGTACAGCTGTGTACAGGCTGCTGGGGTGGGG : 1335  
ChR1 : TGGCGGTGCCGTACGAAGTGGTACCAGCCCTTGGGCGGAGAAATCCCGTACAGCTGTGCAGCAGGCGCAATCACTGGGA : 1410  
Chr2 : TATCGGTACCTACGAAGTGGTACCAGCCCTTGGGCGGTACGAATCCCGTACAGCTGTGTACAGGCGCAATCACTGGGG : 1341

VChR1 : GGCTGCGACTTTGTGTGATGCAACCGGAGTTCTTCCTGACCAAGGACCCAGGGTCTCTCTCCACAGGTCAAAATG-A : 1372  
VChR2 : GGCTGCGACTTTGTATCTCTACATCCGGAGTTTTCCTGACCAAGTCTTCCAGGCTTCCCTGTCTCGGT-GCCTCCCA : 1414  
ChR1 : GGCTGCGACTTTGTCTCTCATGCAACCGGAGTTCTTCCTGACCAAGGACCCAGGGTCTCTCTCCACAGGTCAAAATG : 1490  
Chr2 : GGCTGCGACTTTGTGTTGATTCACCCGAGTTCTTCCTGACCAAGGACCCAGGCTCTCTAGCCCTCT-GCCTCCGCG : 1420

VChR1 : TGGTTCAGCGTACGGGAGCGTTCGGATGGTCTCAGATGGGCCCATGCGCGGACCTCATTTGAGAGTCTGGTGTGGG : 1452  
VChR2 : TAGGTCAGCGTTCGGGAGCATTCGGTGGTCCCGTGGCCCTGTCGCTGATCTCATTTGAATCCGCTGGGCTGGATGGC : 1494  
ChR1 : CGGTTCAGCGTTCGGGAGCGTTCGGTGGTCCCGTGGCCCATGCGCGGACCTCATTTGAGAGTCTGGGCTTGGG : 1569  
Chr2 : CGGTTCAGCGTTCGGTGGTTCGGTGGGCGAGCTGGGCCCATGCGCGTTCGCTGATTCGAGTCCGCAATCTGACG : 1500

VChR1 : TGGCTTGGAGGGCCCCAGCTTCGGCTCCGGGAAT---CAGCCAGGC---TGCTCT-CCAGC---ACCTGGTGGT : 1514  
VChR2 : TGGCTTGGAGGGCCCCAGCTTCGGCTCCGGGAAT---TAGCCTGC---CAACCTTCCAAGC---CTGGTCCCT : 1556  
ChR1 : TGGCTTGGAGGGCCCCAGCTTCGGCTCCGGGAAT---CAACCAGCA---GGCGCTGTGGC---GCATGATCAA : 1631  
Chr2 : TGGCTTGGAGGGCCCTTCGTTCGGACAGGGATCCTGCGGCCCAATCGTTCGCTGTGGCCCAAGATGCAACAGATGGG : 1580

VChR1 : GAAATGCAACAAGCCCAACCGCATGGCGGCATGGGTACATGATGGTGGCGGATGGGCAACGGCATGGGCATGGGCA : 1594  
VChR2 : GCGATGCAAGATGGCGCAAGATGGCGG---GATGTTGGCGGATGGGT--- : 1605  
ChR1 : CCGATGCAAGAGGCAACAGATGG---GATGATG---GGCGATG--- : 1674  
Chr2 : CAAATGCAAGATGCAACAGATGG---GATGATGACCGGCGATGAAAC--- : 1629

VChR1 : TGGGTATGGGATGGGTATGGCAACGGCATGGGATGGGATGAGGACAGGCTGGGATGGGCAACGGTATG : 1674  
VChR2 : GGAATGCTC---GGCAACAACTG---ATGCTTGGCAGTGGTGGGG--- : 1646  
ChR1 : GGAATGGC---ATGGCGCGCGCATG---GATATGGGATGGTATGGGCAATGGGCA--- : 1726  
Chr2 : GGAATGGCGCGCGGTATGGCGCGCGCATG---AACGGCATGGGCGGCGGCAACGGCATGAAC--- : 1692



VChR1 : GGTATCGGC<sup>\*</sup>CAA<sup>\*</sup>GGCATGGGC<sup>\*</sup>CAA<sup>\*</sup>GGTATCGGTATGGGCAACGGGATGGGTATGGGCAACGGTATGGTATCGGGCAACGG : 1754  
VChR2 : ---TGGCTG---ATGGCCCGGGTCCC<sup>\*</sup>GGGAGGC---GGG : 1680  
Chr1 : ---TGGGCCCGAGCATGAACCGGGCATGACTGGCCGG : 1767  
Chr2 : ---ATGGCCAA<sup>\*</sup>GGCATGGCC<sup>\*</sup>GGCATGGCAACGGC---ATGGGC : 1734

VChR1 : TATGGGTATGGCAA<sup>\*</sup>CGGTATGGGTAAC<sup>\*</sup>GGCATGGGCAACGGGATGGGTATGGGCAACGGTATGGGCAACGGTATGGG : 1831  
VChR2 : ---GGCGCCCATGGCC<sup>\*</sup>TGGGAT---GACGGGCATGGGCATGGGTGGGACTAATGGCATGGGGC : 1741  
Chr1 : ---GGCGCTCCATGGCCGTCCGGT---CATGGGCATGGGCAAC---TGGGATGCAGCCAT--- : 1820  
Chr2 : ---GGCAATGGCATGAACGG---AAAGGGTGGCGGCAAC---ACGGATGCAACAACATGGGGC : 1786

VChR1 : GTAA<sup>\*</sup>CGGTATGGGCAACGGTATGGCAA<sup>\*</sup>CGGTATGGGCAACGGGATGGGTATGGGCAACGGTATGGTATGGCAA<sup>\*</sup>CGGT : 1911  
VChR2 : CCGGCCCTGTC---GGCAACAGTGT---GGCAACAGTGT---GGCAACAGTGT---GGCAACAGTGT : 1772  
Chr1 : ---GCAGCAGGCTATGGC---GGCAACAGTGT---GGCAACAGTGT---GGCAACAGTGT : 1844  
Chr2 : CCAA<sup>\*</sup>CGGAATGGCC---GGCAACAGTGTGGCGGCATGGGC---GGCAACAGTGT : 1836

VChR1 : ---ATGGCAATGGTATGGCAA<sup>\*</sup>CGGTATGGGCAACGGTATGGGCAACGGTATGGGCAACGGTATGGGCAACGGTATGGG : 1987  
VChR2 : CTCGATGGCAGGTGCTTCGGC---CGCATCGGCATGGGATGGGCAACGGTATGGGCAACGGTATGGGCAACGGTATGGG : 1825  
Chr1 : GCCATGA---TGA<sup>\*</sup>CTCAGCAGCC---TGGCAACGGTATGGGCAACGGTATGGGCAACGGTATGGGCAACGGTATGGG : 1894  
Chr2 : ---ATGG---TGGCTGCATGAA<sup>\*</sup>CGCATGAGTCCCGGTG---GTGCAACGTGACGCCCTCCGGCGCC : 1900

VChR1 : GAATGGGCATGGG<sup>\*</sup>GGCATGGGCAACCTTGTCTGCTGCCCTGGCAACGGCATGTACGGAGGTGGCGCGCGGGCGGGCGGC : 2067  
VChR2 : GCGTGGCGTTGGAGACAG---GGCAACAGTGT---GGCAACAGTGT---GGCAACAGTGT---GGCAACAGTGT : 1845  
Chr1 : GCGCGGC---GGCGCATG---GGCAACAGTGT---GGCAACAGTGT---GGCAACAGTGT : 1911  
Chr2 : GG---GGCATGGG<sup>\*</sup>GGCATG---GGCAACAGTGT---GGCAACAGTGT---GGCAACAGTGT : 1917

VChR1 : AGCAGATGGGAGCGGCAATGAGCCATGATGACGGGCTGGTATGGGCGAGGCAACGGGTTGGCGTGGCCCCGG : 2147  
VChR2 : CAGCAATGGCGCGAAC<sup>\*</sup>GCATGG---GGCAACAGTGT---GGCAACAGTGT---GGCAACAGTGT---GGCAACAGTGT : 1870  
Chr1 : ---GAGCCATGGGTG---TGGCAACAGTGT---GGCAACAGTGT---GGCAACAGTGT---GGCAACAGTGT : 1941  
Chr2 : ---ATGAAC<sup>\*</sup>CGCATG---GGCAACAGTGT---GGCAACAGTGT---GGCAACAGTGT---GGCAACAGTGT : 1937

VChR1 : TGGCGTCGTAGCAACCTGGGAGCAGTGGCTACAGCCAGTCCAGATGATGGCGGTCGCAACGTTGTCCGCATGA : 2227  
VChR2 : GCCCTACGTCTTT---GGCAACAGTGT---GGCAACAGTGT---GGCAACAGTGT---GGCAACAGTGT : 1883  
Chr1 : ---GCCCGG---GGCGCATG---GGCAACAGTGT---GGCAACAGTGT---GGCAACAGTGT : 1952  
Chr2 : ---GCCCAAGTCCCGCATGAA<sup>\*</sup>CGCGG---GGCAACAGTGT---GGCAACAGTGT---GGCAACAGTGT : 1964

VChR1 : GCTCTCCGAGCTGCAACTGCAGCAGTCGTCTGCAATGCCCTGGTGGACTGGCCCGAA<sup>\*</sup>CCATATGGGCAACAA<sup>\*</sup>TCC : 2307  
VChR2 : CCAGTTGGGAGCAAC<sup>\*</sup>CCC---GGCAACAGTGT---GGCAACAGTGT---GGCAACAGTGT---GGCAACAGTGT : 1902  
Chr1 : ---CCCGTGGGACCAAC<sup>\*</sup>CCC---GGCAACAGTGT---GGCAACAGTGT---GGCAACAGTGT---GGCAACAGTGT : 1971  
Chr2 : ---CCCGTGGGACCAAC<sup>\*</sup>CCC---GGCAACAGTGT---GGCAACAGTGT---GGCAACAGTGT---GGCAACAGTGT : 1983

VChR1 : TTGTTCGGCC<sup>\*</sup>GGCATGGGCAACCTTGTCTGCTGCCCTGGCAACGGCATGTACGGAGGTGGCGCGCGGGCGGGCGGC : 2358  
VChR2 : CTCTCAACAGCAGCCCATGGCCCTGAGCTCCAGC<sup>\*</sup>CGGATGGGCAACGGTATGGGCAACGGTATGGGCAACGGTATGGG : 1982  
Chr1 : CTGTTCGGCTGTGGCCCTCTCCCTGAGCTCCAGC<sup>\*</sup>CGGATGGGCAACGGTATGGGCAACGGTATGGGCAACGGTATGGG : 2022  
Chr2 : CTCTCAACAGCAGCCCATGGCCCTGAGCTCCAGC<sup>\*</sup>CGGATGGGCAACGGTATGGGCAACGGTATGGGCAACGGTATGGG : 2034

VChR1 : ---ACAGGATGTCTCA<sup>\*</sup>CCGCAATT---GGCAACAGTGT---GGCAACAGTGT---GGCAACAGTGT---GGCAACAGTGT : 2381  
VChR2 : GCGGCTACCGAGCAGCCAGCAACA<sup>\*</sup>CGATGAA<sup>\*</sup>GCATGCAAGCCGGCGGCTCCGTGGCAACTCTGGCATCCTGGCGG : 2062  
Chr1 : ---GGCAACAGTGT---GGCAACAGTGT---GGCAACAGTGT---GGCAACAGTGT---GGCAACAGTGT : 2068  
Chr2 : ---GGCAACAGTGT---GGCAACAGTGT---GGCAACAGTGT---GGCAACAGTGT---GGCAACAGTGT : 2068

VChR1 : ---AGGCATG<sup>\*</sup>---GGCAACAGTGT---GGCAACAGTGT---GGCAACAGTGT---GGCAACAGTGT---GGCAACAGTGT : 2412  
VChR2 : GCGGTTGGGAGCATGATGGGCCCCCGGGGCGCTGTGCGCCACAGCGGCAGCGA<sup>\*</sup>GGGGGGCCCGGCGGTGAC : 2142  
Chr1 : ---AGGCATG<sup>\*</sup>---GGCAACAGTGT---GGCAACAGTGT---GGCAACAGTGT---GGCAACAGTGT---GGCAACAGTGT : 2049  
Chr2 : CCGGAATGGGAGGCATG<sup>\*</sup>---GGCAACAGTGT---GGCAACAGTGT---GGCAACAGTGT---GGCAACAGTGT---GGCAACAGTGT : 2121

VChR1 : AGCTCGGT<sup>\*</sup>CGGTTGGCGTTCA<sup>\*</sup>GTGGGACCGAGCAACAGATATGCTGCAA<sup>\*</sup>AGCTATGCGGAGATCAATCGGCT : 2492  
VChR2 : ATGGGGACCGTGGCGGGCGGGCCCGCGCTT<sup>\*</sup>TGAGCTGATGCTTCAGCAACTATGGGGAGATCAACCGCT : 2222  
Chr1 : GCCCACC<sup>\*</sup>CGGCTGGCGGAGCG---AGCGGAGATGCTGCAGCAACTATGCGGAGATCAACCGCT : 2117  
Chr2 : ACGACGAGCTGCGGGCGGAA<sup>\*</sup>CG---GGGAGCGGATGCTGCAGCAACTATGCGGAGATCAATCGGCT : 2192

```

*           2900           *           2920           *           2940
VChR1 : CAAGGACGAGCTGGCGAGTAA----- : 2514
VChR2 : GAAGAGCGAGTTGGCGAGTGA----- : 2244
ChR1  : CAACAACGACTCGCCACTAA----- : 2139
ChR2  : GAAGCCGAGCTTGGCGAGTAA----- : 2214

```

**Supplemental Figure S4.** Aligned coding sequences of *VChR1*, *VChR2*, *ChR1* and *ChR2* with highlighted intron positions. Alignment of nucleotide sequences was done using the Multiple Sequence Comparison by Log-Expectation program (MUSCLE). Alignments were illustrated using GeneDoc 2.6. White letters on black background, conserved in 100% of the sequences at the corresponding position; white letters on dark gray background, conserved in 75% of the sequences at the corresponding position; black letters on light gray background, conserved in 50% of the sequences at the corresponding position. Intron positions are indicated within each coding sequence by vertical red bars. Sites with introns are highlighted with red arrows. Numbers at the right side of the sequence alignment correspond to nucleotide numbering of *VChR1* (Acc. No. EU285658), *VChR2* (Acc. No. EU285660), *ChR1* (Sineshchekov et al., 2002, Acc. No. AF508965), and *ChR2* (Sineshchekov et al., 2002, Acc. No. AF508966) coding sequences. The numbers above the alignment (marker line) are for orientation.

### **con1**

Identities: 51 of 70 residues (73%), similarities: 64 of 70 residues (91%),  
gaps: 0 of 70 residues (0%).

```
VChR1 266 IHEHILLYGDIRKKQKITIAGQEMEVETLVABEEBDDTVKQSTAKYASRDSFITMRNRMRE 325
IHEHILLYGDIRK QKI +AG+E+EVETL+ EE DTVK+STA+YA+R+SF+TMR++++E
VChR2 266 IHEHILLYGDIRKVQKIRVAGEELEVETLMTEEAPDVTVKKSTAQYANRESFLTMRDKLKE 325

VChR1 326 KGLEVRASLD 335
KG EVRASLD
VChR2 326 KGFVVRASLD 335
```

### **con2**

Identities: 86 of 113 residues (76%), similarities: 98 of 113 residues (87%),  
gaps: 0 of 113 residues (0%).

```
VChR1 383 GRVILAVPDISMVDFFREQFAQLPVPYEVVPALGAENTVQLVQQAAMLGGCDFVLMHPEF 442
GRVILAVPDISMVD+REQFAQLPV YEVVPALGA+N VQLV QAA LGGCDFVL+HPEF
VChR2 397 GRVILAVPDISMVDYFREQFAQLPVPYEVVPALGADNAVQLVVQAAGLGGCDFVLLHPEF 456

VChR1 443 LRDRGPTGLLPQVKMMGQRTAAPGWSQMGPMRDLESSGVGAWLEGPSFGSGI 495
LRD+ T L +++ +GQR AAFGWS +GP+RDLES+G+ WLEGPSFG GI
VChR2 457 LRDKSSTSLPARLRSIGQRVAAPGWSFVGPVVRDLESAGLDGWLEGPSFGLGI 509
```

### **con3**

Identities: 17 of 21 residues (81%), similarities: 18 of 21 residues (86%),  
gaps: 0 of 21 residues (0%).

```
VChR1 817 ETDMLQQQLMTEINRLKDELGE 837
E +MLQQQLM EINRLK ELGE
VChR2 727 EAEMLQQQLMAEINRLKSELGE 747
```

**Supplemental Figure S5.** Protein sequence alignment of the con1, con2 and con3 regions of VChR1 and VChR2. BLASTp result (basic local alignment search tool, protein) using the National Center for Biotechnology Information (NCBI) databases. Numbers on both sides of the sequence alignment correspond to amino acid residue numbering of VChR1 (Acc. No. EU285658) and VChR2 (Acc. No. EU285660). Identical and similar (“+”) amino acid residues are given between the sequences.

10 20 30 40 50 60 70 80 90 100  
VChR1/v.c. YCEGWLWVVFALSVA CLGWYAYQAWRATCGWEEVYVALIEMMKSIIEAFHEFDSPATLWLSGNGVVMWRYGEWLLTCPVLLIHLSNLTDSYKRTMGLLV  
VChR2/V.c. FCMKWLWAAFALSVIILIIYAYATWRRTCGWEEVYVCCVELTKVVIEFFHEFDEPGMLYLANGNRVLWRYGEWLLTCPVILIHLSNLTDSYKRTMRLLV  
Chr1/C.r. FCLAWLWITFALSALCLMFYGYQTWKSTCGWEEIYVATIEMIKFIIEYFHEFDEPAVIYSSNGNKTVWLRVYAEWLLTCPVILIHLSNLTDSYKRTMGLLV  
Chr2/C.r. YCAGWIWLAAGFSILLMFYAYQTKWSTCGWEEIYVCAIEMVVKVILEFFFEFKNPMSMLYLATGHRVQWLRVYAEWLLTCPVILIHLSNLTDSYKRTMGLLV  
Br/G.v. SVSDSLSFAIAAMFASALFFFS.AQALVQGRYRLALLVSAIVVSIYHYFRIFNSAAYVLENGVKFNDAIRYVDWLLTPVPLLLVTVAVLKEARPLKLTIV  
Ops2/G.t. SGAIFDVLAWIALLFTALFMAFKAVNA.DPVVRKFFYYINAFVCGVFSYFAMISGMGWETIMGCRQMFYVRYIDWFITPMLILNIGLLAGEEQWMIAIMG  
Ops1/G.t. TGVGALTITIFLLAVST.IIFITRVGPATSKQVYVYCNVVICGLMSYFAMLSGQGWTAVAGCRQFFYARYVDWLLTPTALIIIELEGLIAGAEPAALIGVMG  
Ops/Cry.sp. TGIGGLTLGFLALTIVTVMVAKAANA.DPERRKYYFCNTFCIGIFAYFAMLSGQGWTAISGCRQFFYAHYVDWLLTPTLIILNGLIAGQDQVYTVIAVCG  
Nop-1/N.c. PTPTEYVWTFALMVLSSGIFALLSINVPTSK.RLFHVITTLITVLSYFAMATG.HATTFNCDRQVFVGRVYVDWLLTPTLLELCLLAGVDGAGHTMAIV  
Hop/S.r. ALASSIYVNIALAGLTIIVIAVMSRSIHDSRAKLIWMTLMISVSSYMLASGIDPLVMPGVLISLWGRYLTWAFSTPFPILLALGLLARSTDKISAI  
Chop3/Ha.v. LLNSSLWVNIALAGVIVLLFVAMCRELESRAKLIWVATMLVPLVSSYAGLASGCVFLOMPPGVLSWGRYLTWTFSTPMILLALGLLADTDMSLTAIT  
Hop/H.m. LLNSSIWNIALAGVIVLLFVAMCRDLESPRAKLIWVATMLVPLVSSYAGLASGCVFLOMPPGVLSWGRYLTWTFSTPMILLALGLLADTDIASLTAIT  
Hop/N.p. LLASSLYINIALAGLSILLFVFMTRGLDDPRAKLIWVATMLVPLVSSYAGLASGCVFLEMPAGVVTMGRYLTWALSTPMILLALGLLAGSNATKLTAIT  
Hop/H.sp. LLASSLWVNIALAGLSILLFVYMGCRNVEDPRAQLIFVATMLVPLVSSYAGLASGCVSFLMPAGVLTTPWGRYLTWALSTPMILLALGLLAGSNATKLTAVV  
Hop/Hr.sod. LLASSLWVNIALAGLSILLFVYMGCRNLEDPRAQLIFVATMLVPLVSSYAGLASGCVSFLMPAGVLTTPWGRYLTWALSTPMILLALGLLAGSNATKLTAVV  
Hopa/Ht.sp. LLHSSLWVNIALAGLSILLVFLYMARTVRANRRLIVGATLMIPLVSSYGLVGTGAGPIEMPAAVLSQWGRYLTWALSTPMILLALGLLAEVDTADLVVIA  
Hopb/Ht.sp. LLHSSLWVNIALAGLSILLVFLYMARTVRANRRLIVGATLMIPLVSSYGLVGTGAGPIEMPAAVLSQWGRYLTWALSTPMILLALGLLAEVDTADLVVIA  
Hop/H.s. LLSSSLWVNIALAGIAILLVFLYMGRTIRPGRRLIAGATLMIPLVSSYGLLSGVMIEMPAGVRSQWGRYLTWALSTPMILLALGLLADVDLGSALTIVIA  
Hop/H.w. LLSSSLWVNIALAGLSILLFVYMGCRNITSGRARLIWATMLVPLVSSYGLSAGVGFLEMPAGVMSQWGRYLTWALSTPMILLALGLLADVDGRSALTIVIA  
Br/N.sp. LESLLHWIYVAGMTIGALHFWSLSRNPRGVPQYEVYLVAFIPIWLAYMAMAIDQKVEAAGQ.IAHYARYIDWMTPTPLLLLSLWSTAKKDWTLIFLMS  
Xop2/H.m. QEIVVYGAGAGAFFVSAVVFVFAATRGNIRSSFYYLPPHITS.VAAYVAMAL.IAGGQLGDTVSITTLRFADWIVSTPIITTYLARLAGVDTQTRLAVA  
Sop1/H.sp. AVSAAWIAAVAFVLGLGITAALYAKLGESEDRGRLAALAVIPGFLAYAGMALGIGTVTVNGA.ELVGLRYVDWVITPTLLLVGFIGYVAGASRRRIGVML  
Sop/Hr.sod. AVTSAYWLAAVAFILGVIITAALYAKLEGRSRRTRLAALAVIPGFLSYVGMALGIGTVTVNGA.ELVGLRYVDWVITPTLLLVGFIGYNAGASRRRIGVMI  
Sop1/H.s. AVATAYLGGAAVALIVGVAFVWLLYRSLDGSPHQSALAPLAIIPVFLSYVGMAYDIGTVIVNGN.QIVGLRYIDWVITPTLLLVGFIGYVAGASRRRIGVMI  
Csr3/Ha.v. AVAVVYGITAAAGFAVGVAIVGYLYASLEGESEERSILAAALALIPGFISYVAMAFGIGTVITIGET.TLVGFRYLDWVITPTLLLVGFIGYVAGASRRRIGVMV  
Sria/S.r. PITIVYIIGTLGMLVGI...PPALSLVGDVEGLDFDYVWAIPGIFMYLLMFFDVGSVQFQGY.HVPIPRYIDWLLTPTLLLVGYTAYIAGASRCMIGTAL  
Srib/S.r. ATTIVLMGLTAGMLFGI...PPCLRLDMEADGHFGYLLIIPGFLMYALMFFGVTQTFQGY.TVPLRLYLDWVITPTLLLVGYAAYVAGTSKRIGI  
BopII/H.w. SEATWLWIGTI GMVLGTVYFAVRCRGSTDPDEQQTYYIITTLIPAIYAALAMATGLGVISMPIRIDIYWARYADWLLTPTLLIIDLALVAGARKQTLKLI  
BopI/H.w. GEGIWALALGTIGMLLMYFIADGLDVQDPRQKFEYVITILIPAIYASYSMFFFGGLTEVSLAVDVYWARYADWLLTPTLLIIDLALVAGARKQTLKLI  
Xop1/H.m. GEGIWALALGTIGMLLMYFIADGLDVQDPRQKFEYVITILIPAIYASYSMFFFGGLTEVSLAVDVYWARYADWLLTPTLLIIDLALVAGARKQTLKLI  
Bop/H.s. PEWILWALGTALMCLGTLVFLVKMGVSDDDAKKFAITTLVPAITMYLSMLLGYGLTMVFFGNPIYWARYADWLLTPTLLIIDLALVAGARKQTLKLI  
Ar2/H.sp. PETLWLGIGTLMLLIGTFYFIARCGVTDKAREYYAITILVPGIAAYLSMFFFGIGLTVGLDIYARYADWLLTPTLLIIDLALVAGARKQTLKLI  
Ar3/Hr.sod. PETLWLGIGTLMLLIGTFYFIARCGVTDKAREYYAITILVPGIAAYLSMFFFGIGLTVGLDIYARYADWLLTPTLLIIDLALVAGARKQTLKLI  
Ar1/H.sp. PETLWLGIGTLMLLIGTFYFIARCGVTDKAREYYAITILVPGIAAYLSMFFFGIGLTVGLDIYARYADWLLTPTLLIIDLALVAGARKQTLKLI  
Aop/H.x. PETLWLGIGTLMLLIGTFYFIARCGVTDKAREYYAITILVPGIAAYLSMFFFGIGLTVGLDIYARYADWLLTPTLLIIDLALVAGARKQTLKLI  
Br/H.l. PESLWLVGTIGMTLGLTYFLGRGRGVDPKMQQFYIITIFVTTIAMYFAMATGFVTEVTGLTIYARYADWLLTPTLLIIDLALVAGARKQTLKLI  
Bop/Ht.sp. PESIWLWIGTI GMLTGLTYFLGRGRGVDRKMQEFYIITIFVTTIAMYFAMATGFVTEVTGLTIYARYADWLLTPTLLIIDLALVAGARKQTLKLI  
Cop2/H.sp. GESIFLWVGTAGMFLGMLYFIARCVSDDRRQKFIATIMIAAVNYLSMALGFGVTTIELGRAIYARYADWLLTPTLLIIDLALVAGARKQTLKLI  
Bop/H.m. SEGIWLWLGTAGMFLGMLYFIARCVGTEGDRRQKFIATILITAIIVNYLAMALGFGGLTFIEFGHPYIYARYADWLLTPTLLIIDLALVAGARKQTLKLI  
Cop/H.j. SEAIWLWLGTAGMFLGMLYFIARCVGTEGDRRQKFIATILITAIIVNYLAMALGFGGLTIVEFAHPYIYARYADWLLTPTLLIIDLALVAGARKQTLKLI  
Cop3/Ha.v. GEAIWLWLGTAGMFLGMLYFIARCVGTEGDRRQKFIATILITAIIVNYLAMALGFGGLTIVEFAHPYIYARYADWLLTPTLLIIDLALVAGARKQTLKLI  
Sop2/H.s. ALTTWFVWVAVGMLAGTVLPI..RDCIRHPSHRRYDLVLAGITGLIAYTMMGLGITATTVGDV.TVYLARYIDWVITPTLLIVLYLAMLARPHRTSWLLA  
Pr/H.sp. DTTVWAWIGALAMCAGTLWAWLSGSSATDESHGVYGTLAGVTVLAYLAMALGVTGTLSTAAG.ELEVRYVDWVITPTLLIVLYLAMLARPHRTSWLLA  
Sop2/Ha.v. TITWFTLGLLCELLGTAVALY.GYTLVPEERTRKRYVLLIAPGIVAYALMALGFGSISQSEGH.AVYVRYVDWVITPTLLIVLYLAMLARPHRTSWLLA  
Sop2/N.p. GLTTLFWLGAIGMLVGTALFAWACRDAGSERR.YYVTVLIVGISGIVAVVVMALGCVGWVPAER.TVFAPRYIDWVITPTLLIVLYLAMLARPHRTSWLLA

110 120 130 140 150 160 170 180 190  
VChR1/V.c. SDVGCIVWGATSAMCTGWTILFFLISLSYGMYYFLVRVMAWTFVAVWGMFPVLFLLGTEGFGHISPYGSAIGHSILDLLIAKNMVGVLVLR  
VChR2/V.c. SDVGTIVWGATAAMSTGYIVIFFLLGCMYGANTFFLVRAMAWLFFVSWGMFPVLFLLGPEGFGHLSVYGSTIGHHTIIDLLSKNCWGLLFLR  
ChR1/C.r. SDIGTIVWGTTAALSKEYVVIFFLMLGLCYGIYFFLVRYLAWLFCYSWAMFPVLFLLGPEGFGHINQFNSAIAHAAILDLASKNAWSMMFLR  
ChR2/C.r. SDIGTIVWGATSAMATGYVVIFFCLGLCYGANTFFVVTGMAWLFFVSWGMFPILFILGPEGFGVLSVYGSTVGHHTIIDLMSKNCWGLLYLR  
Br/G.v. ASVLMIAATGYPGEISDDITIIWGTVSTIPFAYILYLVRNMRWLLLLSWGVPIAYLLPMLGSGTSAAVGVQVGYTIADVLAKPVFGLLVF.  
Ops2/G.t. ADMGMIFAGYMGSSVALVPTLWLFVIGLVVYIPVVILYGVKVSLLTVVSWSVYFVWLLSV.GTGGGLGVSAESILYALLDVTSKCFSSFM...  
Ops1/G.t. ADVIMIVGGYLGTVSVTTWFVFIISMALEFVVVLYVYGRWLAWLTVSWIFYPVWVLF.SDGFASFVSFEVCAYSILDIASKAIFGFMVMS  
Ops/Cry.sp. ADVLMIISGYMASVSVVTTWFVYLFICGMFLPIIYLYGKVAWLTIIWCFYPVWVLF.SQGFASFVSFETVAITIMDVIKCVFSEFMIIA  
Nop-1/N.c. ADVIMVLCGLFAALGEGGNWGWYIGCFYSFLVVIWLTGLAVFALLLWTAYPIIW..GIAGARRTNVDTEILIIYTVLDDLAKPVFGLVLL  
Hop/S.r. LDVFMCLTGLAAALTTSSHWLWYALSTAFFVGLVYIFSTLQWMTIVLWIGYPVWVWALGNLGLALLEVGATSWAYSGLDIFAKYAFTHIILVL  
ChoP3/Ha.v. MDIGMCITGLAAALVTSSHWVFFYGISCAFFIAVLYIFGTLKLLTVVWLVGYPILWALGSEGVALLSVGVTWGYSGLDILAKYVFAFLLLR  
Hop/H.m. MDIGMCVTLGAAALITSSHWVFFYGISCAFFVAVLYIFGTLKLLTVVWLVGYPILWALGSEGVALLSVGVTWGYSGLDILAKYVFAFLLLR  
Hop/N.p. FDIAMCVTLGAAALTTSSHWVFFYISCAFFLVVLYMNTLKLTVVWLVGYPVWVWALGSEGVALLSVGVTWGYSGLDILAKYVFAFLLLR  
Hop/H.sp. ADIGMCVTLGAAALTTSSYVWVYIISCAFFVAVLYIFNTLKLTVVWLVGYPVWVWALGSEGVALLSVGVTWGYSGLDILAKYVFAFLLLR  
Hop/Hr.sod. ADIGMCVTLGAAALTTSSYVWVYIISCAFFVAVLYIFNTLKLTVVWLVGYPVWVWALGSEGVALLSVGVTWGYSGLDILAKYVFAFLLLR  
Hopa/Ht.sp. ADIGMCVTLGAAALTTSSYVWVYIISCAFFVAVLYIFNTLKLTVVWLVGYPVWVWALGSEGVALLSVGVTWGYSGLDILAKYVFAFLLLR  
Hopb/Ht.sp. ADIGMCVTLGAAALTTSSYVWVYIISCAFFVAVLYIFNTLKLTVVWLVGYPVWVWALGSEGVALLSVGVTWGYSGLDILAKYVFAFLLLR  
Hop/H.s. ADIGMCVTLGAAALTTSSYVWVYIISCAFFVAVLYIFNTLKLTVVWLVGYPVWVWALGSEGVALLSVGVTWGYSGLDILAKYVFAFLLLR  
Hop/H.w. ADIGMCVTLGAAALTTSSYVWVYIISCAFFVAVLYIFNTLKLTVVWLVGYPVWVWALGSEGVALLSVGVTWGYSGLDILAKYVFAFLLLR  
Br/N.sp. TQIVVITSGLIADLSEDRDWLWYICGVCAFLIILWLYDKLVYTFVWLVGYPVWVWALGSEGVALLSVGVTWGYSGLDILAKYVFAFLLLR  
Xop2/H.m. ANVVMIGVGYGFSVMSGSLWIAFAVSTVAFIIGLLYLFQSLRDLTVVWVSLYVWVYFLGGLGTGIIQAPDLNLFVAVLDTIAKVFMSILLV  
Sop1/H.sp. ADALMIAFGAGAVVTGGTLWVLFVSSIFHVLFLFALFSLKKNHVGLLWLVAYPLVWLVGFP.GLQVDAAGIAVVISYLDVTAKVFPVYFYR  
Sop/Hr.sod. ADALMIVFGAAAVVSGGTLWVLFVSSIFHVLFLFALFSLKKNHVGLLWLVAYPLVWLVGFP.GLQVDAAGIAVVISYLDVTAKVFPVYFYR  
Sop1/H.s. ADALMIVFGAGAVVTGGTLWVLFVSSIFHVLFLFALFSLKKNHVGLLWLVAYPLVWLVGFP.GLQVDAAGIAVVISYLDVTAKVFPVYFYR  
Csr3/Ha.v. ADALMILTVGAVVADGTLWVLFVSTVFFHVSFLFALFSLKKNHVGLLWLVAYPLVWLVGFP.GLQVDAAGIAVVISYLDVTAKVFPVYFYR  
Sria/S.r. ADFMIVFGLGAVVFSSTAVVFFGLSSACHLTLALARLLNLYVGLLWLVAYPLVWLVGFP.GLQVDAAGIAVVISYLDVTAKVFPVYFYR  
Srib/S.r. VDAVMIGLGTAAVVTAPPTWIFFGLAALCHLVLLGLARLLVNHVGLLWLVAYPLVWLVGFP.GLQVDAAGIAVVISYLDVTAKVFPVYFYR  
BopII/H.w. IDAIMILGGLAGSMMQCGAIVWVAVSTAFAIILLYVFNRLRNLITGLWVLYPIVWLVGTEGFGIIVTTEIMLYVMDIGTKIFGAVLLE  
BopI/H.w. IDAFMIVTGLVATLTKVVVYAFWTISTISMVFLLYTFNLRNLIILVWVAYPLVWLVGTEGFGIIVTTEIMLYVMDIGTKIFGAVLLE  
Xop1/H.m. IDAFMIVTGLAATLMKVPVYAFWTISTIAMLVFLYTFNLRNLIILVWVAYPLVWLVGTEGFGIIVTTEIMLYVMDIGTKIFGAVLLE  
Bop/H.s. ADGIMIGTGLVGLTKVYSFVWVAIISTAAMLYILYTFKVLNRNVTVVWLVGTEGFGIIVTTEIMLYVMDIGTKIFGAVLLE  
Ar2/H.sp. VDALMIVTGLIGALSHTPLYTWLWVSTIAFLVLYTFNLTALVAVLWVAYPLVWLVGTEGFGIIVTTEIMLYVMDIGTKIFGAVLLE  
Ar3/Hr.sod. VDALMIVTGLIGALSHTAIYSWVLFSTICMIVVLYTFNLTALVAVLWVAYPLVWLVGTEGFGIIVTTEIMLYVMDIGTKIFGAVLLE  
Ar1/H.sp. VDALMIVTGLVGLSHTPLYTWLWVSTIAFLVLYTFNLTALVAVLWVAYPLVWLVGTEGFGIIVTTEIMLYVMDIGTKIFGAVLLE  
Aop/H.x. VDALMIVTGLIGALSHTPLYTWLWVSTIAFLVLYTFNLTALVAVLWVAYPLVWLVGTEGFGIIVTTEIMLYVMDIGTKIFGAVLLE  
Br/H.l. LDVFMIGTGAIAAALSTPGIAWVAISTCALLALLYLFCGRRLRNLVIALWFLYVWVWLVGTEGFGIILPLYWETAAFMVLDSLAKVFGVILLQ  
Bop/Ht.sp. LDVFMIGTGAIAAALSTPGIAWVAISTCALLALLYLFCGRRLRNLVIALWFLYVWVWLVGTEGFGIILPLYWETAAFMVLDSLAKVFGVILLQ  
Cop2/H.sp. LDVLMIGTGALATLSAGSGLVWVGISTGFLVLLYKFTLRNLVIVLWLVYVWVWLVGTEGFGIILPLYWETAAFMVLDSLAKVFGVILLQ  
Bop/H.m. LDVLMIGTGVAATLSAGSGLVWVGISTAFLLVLLYTFKTLRNLVTVVWLVYVWVWLVGTEGFGIILPLYWETAAFMVLDSLAKVFGVILLQ  
Cop/H.j. LDVLMIGTGLVATLSAGSGLVWVGISTAFLLVLLYTFKTLRNLVTVVWLVYVWVWLVGTEGFGIILPLYWETAAFMVLDSLAKVFGVILLQ  
Cop3/Ha.v. LDVLMIGTGLVATLSAGSGLVWVGISTAFLLVLLYTFKTLRNLVTVVWLVYVWVWLVGTEGFGIILPLYWETAAFMVLDSLAKVFGVILLQ  
Sop2/H.s. ADVFVIAAGIAAALTGVQWLFVAVGAAGYALLYLVFTLRNITVWVWLVYVWVWLVGTEGFGIILPLYWETAAFMVLDSLAKVFGVILLQ  
Pr/H.sp. VDVVVVAGVGTGAATGGAVWAFAVGGGAYLALVYVFTLRNITVWVWLVYVWVWLVGTEGFGIILPLYWETAAFMVLDSLAKVFGVILLQ  
Sop2/Ha.v. LQALTIVFAGAVTSPVYALFAVGGALFVGYLYRTRNRFVWVWLVYVWVWLVGTEGFGIILPLYWETAAFMVLDSLAKVFGVILLQ  
Sop2/N.p. LNTVWMLAGFAGAMVPGIEYALFGMAVAFGLVLYLVRLRNLTVILWVAYPLVWLVGTEGFGIILPLYWETAAFMVLDSLAKVFGVILLQ

**Supplemental Figure S6.** Trimmed alignment of 45 rhodopsin-related proteins from green algae, fungi, cyanobacteria, cryptomonads, and halobacteria.

Alignment of protein sequences was done using the MUltiple Sequence Comparison by Log-Expectation program (MUSCLE) (Edgar, 2004). Minor manual optimization of alignments, trimming, and management of multi-aligned data was done with BioEdit v7.0.9 (Hall, 1999). Investigated rhodopsins and source organisms are as follows: VChR1/V.c., channelrhodopsin-1, *Volvox carteri*; VChR2/V.c., channelrhodopsin-2, *Volvox carteri*; ChR1/C.r., channelrhodopsin-1, *Chlamydomonas reinhardtii*; ChR2/C.r., channelrhodopsin-2, *Chlamydomonas reinhardtii*; Br/G.v., bacteriorhodopsin, *Gloeobacter violaceus*; Ops2/G.t., opsin-2, *Guillardia theta*; Ops1/G.t., opsin-1, *Guillardia theta*; Ops/Cry.sp., opsin, *Cryptomonas* sp.; Nop-1/N.c., opsin-1, *Neurospora crassa*; Hop/S.r., halorhodopsin, *Salinibacter ruber*; ChoP3/Ha.v., cruxhalorhodopsin-3, *Haloarcula vallismortis*; Hop/H.m., halorhodopsin, *Haloarcula marismortui*; Hop/N.p., halorhodopsin, *Natronomonas pharaonis*; Hop/H.sp., halorhodopsin, *Halobacterium* sp.; Hop/Hr.sod., halorhodopsin, *Halorubrum sodomense*; Hopa/Ht.sp., halorhodopsin, *Haloterrigena* sp.; Hopb/Ht.sp., halorhodopsin, *Haloterrigena* sp.; Hop/H.s., halorhodopsin, *Halobacterium salinarum*; Hop/H.w., halorhodopsin, *Haloquadratum walsbyi*; Br/N.sp., bacteriorhodopsin, *Nostoc* sp.; Xop2/H.m., opsin, *Haloarcula marismortui*; Sop1/H.sp., sensory rhodopsin-1, *Halobacterium* sp.; Sop/Hr.sod., rhodopsin, *Halorubrum sodomense*; Sop1/H.s., sensory rhodopsin-1, *Halobacterium salinarum*; Csr3/Ha.v., bacterial rhodopsin, *Haloarcula vallismortis*; Sria/S.r., sensory rhodopsin a, *Salinibacter ruber*; Srib/S.r., sensory rhodopsin b, *Salinibacter ruber*; BopII/H.w., bacteriorhodopsin II, *Haloquadratum walsbyi*; BopI/H.w., bacteriorhodopsin I, *Haloquadratum walsbyi*; Xop1/H.m., bacteriorhodopsin, *Haloarcula marismortui*; Bop/H.s., bacteriorhodopsin, *Halobacterium salinarum*; Ar2/H.sp., archaerhodopsin-2, *Halobacterium* sp.; Ar3/Hr.sod., archaerhodopsin-2, *Halorubrum sodomense*; Ar1/H.sp., archaerhodopsin-1, *Halobacterium* sp.; Aop/H.x., archaerhodopsin, *Halorubrum xinjiangense*; Br/H.l., bacteriorhodopsin, *Halobiforma lacisalsi*; Bop/Ht.sp., bacteriorhodopsin, *Haloterrigena* sp.; Cop2/H.sp., cruxrhodopsin-2, *Haloarcula* sp.; Bop/H.m., bacteriorhodopsin, *Haloarcula marismortui*; Cop/H.j., cruxrhodopsin, *Haloarcula japonica*; Cop3/Ha.v., cruxrhodopsin-3, *Haloarcula vallismortis*; Sop2/H.s., sensory rhodopsin-2, *Halobacterium salinarum*; Pr/H.sp., phoborhodopsin, *Halobacterium* sp.; Sop2/Ha.v., sensory rhodopsin-2, *Haloarcula vallismortis*; Sop2/N.p., sensory rhodopsin-2, *Natronomonas pharaonis*.

### con1

|       |     |   |   |   |   |   |   |   |   |   |   |   |   |   |   |   |   |   |   |   |   |   |   |   |   |   |   |   |   |   |   |   |   |   |   |   |   |   |   |   |   |   |   |   |   |   |   |   |   |   |   |   |   |   |   |   |   |   |   |   |   |   |   |   |   |   |   |   |   |   |     |     |     |
|-------|-----|---|---|---|---|---|---|---|---|---|---|---|---|---|---|---|---|---|---|---|---|---|---|---|---|---|---|---|---|---|---|---|---|---|---|---|---|---|---|---|---|---|---|---|---|---|---|---|---|---|---|---|---|---|---|---|---|---|---|---|---|---|---|---|---|---|---|---|---|---|-----|-----|-----|
| VChR1 | 266 | I | H | E | H | I | L | L | Y | G | D | I | R | K | K | Q | K | T | T | A | G | Q | E | M | E | V | E | T | L | V | A | E | F | E | D | - | D | T | V | K | Q | S | T | A | K | Y | A | S | R | D | S | F | T | I | M | R | N | R | M | R | E | K | G | L | E | V | R | A | S | L | D   | 335 |     |
| VChR2 | 266 | I | H | E | H | I | L | L | Y | G | D | I | R | K | V | Q | K | I | R | V | A | G | E | E | L | E | V | E | T | L | M | T | E | E | A | P | - | D | T | V | K | K | S | T | A | Q | Y | A | N | R | E | S | F | L | I | M | R | D | K | L | K | E | K | G | L | E | V | R | A | S | L   | D   | 335 |
| ChR1  | 310 | I | H | E | H | I | L | L | Y | G | D | I | R | K | K | Q | K | V | N | V | A | G | Q | E | M | E | V | E | T | M | V | H | E | E | D | - | E | T | C | K | V | E | T | A | K | Y | A | N | R | D | S | F | T | I | M | R | D | L | K | E | K | G | L | E | V | R | A | S | L | D | 379 |     |     |
| ChR2  | 271 | I | H | E | H | I | L | L | Y | G | D | I | R | K | T | T | K | L | N | I | G | G | T | E | I | E | V | E | T | L | V | E | D | E | A | E | A | G | A | V | N | K | G | T | C | K | Y | A | S | R | D | S | F | T | I | M | R | D | K | M | K | E | K | L | E | V | R | A | S | L | D   | 341 |     |

### con2

|       |     |   |   |   |   |   |   |   |   |   |   |   |   |   |   |   |   |   |   |   |   |   |   |   |   |   |   |   |   |   |   |   |   |   |   |   |   |   |   |   |   |   |   |   |   |   |   |   |   |   |   |   |   |   |   |   |   |   |   |   |   |   |   |   |   |   |   |   |   |   |     |     |
|-------|-----|---|---|---|---|---|---|---|---|---|---|---|---|---|---|---|---|---|---|---|---|---|---|---|---|---|---|---|---|---|---|---|---|---|---|---|---|---|---|---|---|---|---|---|---|---|---|---|---|---|---|---|---|---|---|---|---|---|---|---|---|---|---|---|---|---|---|---|---|---|-----|-----|
| VChR1 | 383 | G | R | V | I | L | A | V | P | D | I | S | M | V | D | F | F | R | E | Q | F | A | Q | L | P | V | P | Y | E | V | V | P | A | L | G | A | E | N | T | V | Q | L | V | Q | A | A | M | L | G | C | D | F | V | L | M | H | P | E | F | L | R | D | R | C | P | T | G | L | L | P | 453 |     |
| VChR2 | 397 | G | R | V | I | L | A | V | P | D | I | S | M | V | D | F | F | R | E | Q | F | A | Q | L | P | V | Q | Y | E | V | V | P | A | L | G | A | D | N | A | V | Q | L | V | Q | A | A | G | L | G | C | D | F | V | L | L | H | P | E | F | L | R | D | K | S | S | T | S | L | E | P | A   | 467 |
| ChR1  | 422 | G | R | V | I | L | A | V | P | D | I | S | M | V | D | F | F | R | E | Q | F | A | Q | L | P | V | P | Y | E | L | V | P | A | L | G | A | E | N | T | L | Q | L | V | Q | A | Q | S | L | G | C | D | F | V | L | M | H | P | E | F | L | R | D | R | S | P | T | G | L | L | P | 492 |     |
| ChR2  | 399 | G | R | V | I | L | A | V | P | D | I | S | M | V | D | F | F | R | E | Q | F | A | Q | L | S | V | T | Y | E | L | V | P | A | L | G | A | D | N | T | L | A | L | V | T | Q | A | Q | N | L | G | G | V | D | F | V | L | I | H | P | E | F | L | R | D | R | S | T | S | L | I | S   | 469 |

|       |     |   |   |   |   |   |   |   |   |   |   |   |   |   |   |   |   |   |   |   |   |   |   |   |   |   |   |   |   |   |   |   |   |   |   |   |   |   |   |   |   |     |   |     |
|-------|-----|---|---|---|---|---|---|---|---|---|---|---|---|---|---|---|---|---|---|---|---|---|---|---|---|---|---|---|---|---|---|---|---|---|---|---|---|---|---|---|---|-----|---|-----|
| VChR1 | 454 | Q | V | K | M | M | G | O | R | T | A | A | F | G | W | S | Q | M | G | P | M | R | D | L | I | E | S | S | G | V | G | A | W | L | E | G | P | S | F | G | S | G   | I | 495 |
| VChR2 | 468 | R | L | R | S | I | G | Q | R | V | A | A | F | G | W | S | P | V | G | P | V | R | D | L | I | E | S | A | G | L | D | G | W | L | E | G | P | S | F | G | L | G   | I | 509 |
| ChR1  | 493 | R | L | K | M | G | Q | R | A | A | F | G | W | A | A | I | G | P | M | R | D | L | I | E | G | S | G | V | D | G | W | L | E | G | P | S | F | G | A | G | I | 534 |   |     |
| ChR2  | 470 | R | L | R | G | A | Q | R | V | A | A | F | G | W | A | Q | L | G | P | M | R | D | L | I | E | S | A | N | L | D | G | W | L | E | G | P | S | F | Q | G | I | 511 |   |     |

### con3

|       |     |   |   |   |   |   |   |   |   |   |   |   |   |   |   |   |   |   |   |   |   |     |     |
|-------|-----|---|---|---|---|---|---|---|---|---|---|---|---|---|---|---|---|---|---|---|---|-----|-----|
| VChR1 | 454 | E | T | T | M | L | Q | Q | L | M | T | E | I | N | R | L | K | E | L | G | E | 837 |     |
| VChR2 | 468 | E | A | E | M | L | Q | Q | L | M | A | E | I | N | R | L | K | S | E | L | G | E   | 747 |
| ChR1  | 493 | E | A | E | M | L | Q | Q | L | M | S | E | I | N | R | L | K | N | E | L | G | E   | 712 |
| ChR2  | 470 | E | A | E | M | L | Q | Q | L | M | N | E | I | N | R | L | K | R | E | L | G | E   | 737 |

**Supplemental Figure S7.** Multiple alignment of the con1, con2 and con3 regions of the channelrhodopsins from *Volvox* and *Chlamydomonas*. Conserved amino acid residues were shaded with similarity groups enabled. White letters on black background represent residues conserved in 100% of the sequences at the corresponding position; residues seen in white letters on gray background are conserved in >60% of the sequences.

**Supplemental Table S1.** Sequence comparison of VChR1 and VChR2 to related rhodopsins.

| Gene product        | Species                          | Group             | Acc.No.   | Comparison to VChR1 |                     |         | Comparison to VChR2 |                     |         |
|---------------------|----------------------------------|-------------------|-----------|---------------------|---------------------|---------|---------------------|---------------------|---------|
|                     |                                  |                   |           | Percent identity*   | Percent similarity* | E-value | Percent identity*   | Percent similarity* | E-value |
| channelrhodopsin-1  | <i>Volvox carteri</i>            | green algae       | EU285658  | 100%<br>(837/837)   | 100%<br>(837/837)   | 0.0     | 63%<br>(335/530)    | 77%<br>(412/530)    | 0.0     |
| channelrhodopsin-2  | <i>Volvox carteri</i>            | green algae       | EU285660  | 62%<br>(331/526)    | 77%<br>(410/526)    | 0.0     | 100%<br>(747/747)   | 100%<br>(747/747)   | 0.0     |
| channelrhodopsin-1  | <i>Chlamydomonas reinhardtii</i> | green algae       | AF508965  | 66%<br>(328/496)    | 80%<br>(397/496)    | 0.0     | 62%<br>(328/522)    | 77%<br>(403/522)    | 0.0     |
| channelrhodopsin-2  | <i>Chlamydomonas reinhardtii</i> | green algae       | AF508966  | 56%<br>(300/532)    | 70%<br>(375/532)    | 1e-177  | 60%<br>(325/534)    | 73%<br>(393/534)    | 0.0     |
| bacterioopsin       | <i>Gloeobacter violaceus</i>     | cyano-bacteria    | NP_923144 | 25%<br>(42/164)     | 45%<br>(75/164)     | 5e-10   | 30%<br>(46/152)     | 49%<br>(75/152)     | 4e-13   |
| bacteriorhodopsin   | <i>Nostoc</i> sp.                | cyano-bacteria    | BAB74864  | 34%<br>(16/47)      | 53%<br>(25/47)      | 6e-05   | 30%<br>(12/39)      | 56%<br>(22/39)      | 6e-04   |
| opsin-2             | <i>Guillardia theta</i>          | crypto-monads     | ABA08438  | 22%<br>(32/141)     | 48%<br>(68/141)     | 6e-06   | 20%<br>(33/163)     | 49%<br>(81/163)     | 5e-05   |
| opsin-1             | <i>Guillardia theta</i>          | crypto-monads     | ABA08437  | 25%<br>(38/148)     | 50%<br>(74/148)     | 4e-08   | 25%<br>(43/170)     | 44%<br>(76/170)     | 4e-07   |
| opsin               | <i>Cryptomonas</i> sp.           | crypto-monads     | ABA08439  | 24%<br>(34/141)     | 47%<br>(67/141)     | 7e-09   | 25%<br>(38/149)     | 48%<br>(73/149)     | 1e-09   |
| opsin-1             | <i>Neurospora crassa</i>         | fungi             | AF135863  | 47%<br>(9/19)       | 57%<br>(11/19)      | 0.43    | 26%<br>(42/158)     | 46%<br>(74/158)     | 0.024   |
| halorhodopsin       | <i>Salinibacter ruber</i>        | haloarch.<br>(CI) | YP_446872 | 23%<br>(35/150)     | 42%<br>(64/150)     | 4e-08   | 22%<br>(33/149)     | 44%<br>(67/149)     | 2e-06   |
| cruxhalorhodopsin-3 | <i>Halorcula vallismortis</i>    | haloarch.<br>(CI) | P94853    | 26%<br>(40/151)     | 47%<br>(72/151)     | 7e-07   | 27%<br>(44/159)     | 47%<br>(75/159)     | 8e-09   |
| halorhodopsin       | <i>Halorcula marismortui</i>     | haloarch.<br>(CI) | YP_136278 | 26%<br>(40/151)     | 47%<br>(71/151)     | 6e-08   | 28%<br>(45/160)     | 45%<br>(73/160)     | 7e-08   |
| halorhodopsin       | <i>Natronomonas pharaonis</i>    | haloarch.<br>(CI) | P15647    | 38%<br>(19/49)      | 65%<br>(32/49)      | 9e-05   | 23%<br>(38/160)     | 43%<br>(70/160)     | 1e-04   |
| halorhodopsin       | <i>Halobacterium</i> sp.         | haloarch.<br>(CI) | CAA49773  | 24%<br>(38/157)     | 45%<br>(72/157)     | 1e-05   | 22%<br>(38/166)     | 43%<br>(73/166)     | 5e-08   |
| halorhodopsin       | <i>Halorubrum sodomense</i>      | haloarch.<br>(CI) | O93742    | 25%<br>(40/157)     | 45%<br>(72/157)     | 2e-06   | 23%<br>(36/155)     | 45%<br>(70/155)     | 1e-08   |
| halorhodopsin       | <i>Haloterrigena</i> sp.         | haloarch.<br>(CI) | O93741    | 23%<br>(36/152)     | 46%<br>(71/152)     | 1e-07   | 23%<br>(33/143)     | 46%<br>(66/143)     | 3e-07   |
| halorhodopsin       | <i>Haloterrigena</i> sp.         | haloarch.<br>(CI) | BAA75201  | 23%<br>(36/152)     | 46%<br>(71/152)     | 2e-07   | 23%<br>(33/143)     | 46%<br>(66/143)     | 5e-07   |
| halorhodopsin       | <i>Halobacterium salinarum</i>   | haloarch.<br>(CI) | P16102    | 23%<br>(43/181)     | 42%<br>(77/181)     | 5e-07   | 22%<br>(42/185)     | 42%<br>(78/185)     | 3e-06   |



|                      |                                |                                 |           |                 |                 |       |                 |                 |       |
|----------------------|--------------------------------|---------------------------------|-----------|-----------------|-----------------|-------|-----------------|-----------------|-------|
| halorhodopsin        | <i>Haloquadratum walsbyi</i>   | haloarch.<br>(Cl <sup>-</sup> ) | YP_658762 | 26%<br>(40/153) | 46%<br>(71/153) | 4e-06 | 24%<br>(37/150) | 47%<br>(71/150) | 3e-07 |
| opsin                | <i>Haloarcula marismortui</i>  | haloarch.<br>(SR)               | YP_135281 | 21%<br>(31/142) | 45%<br>(64/142) | 5e-07 | 23%<br>(36/156) | 44%<br>(69/156) | 9e-09 |
| sensory rhodopsin-1  | <i>Halobacterium</i> sp.       | haloarch.<br>(SR)               | P33743    | 25%<br>(37/147) | 53%<br>(78/147) | 1e-09 | 25%<br>(39/154) | 49%<br>(76/154) | 7e-11 |
| rhodopsin            | <i>Halorubrum sodomense</i>    | haloarch.<br>(SR)               | O93743    | 26%<br>(40/152) | 48%<br>(74/152) | 6e-09 | 26%<br>(41/155) | 48%<br>(75/155) | 3e-11 |
| sensory rhodopsin-1  | <i>Halobacterium salinarum</i> | haloarch.<br>(SR)               | P25964    | 26%<br>(39/147) | 51%<br>(75/147) | 6e-12 | 26%<br>(52/198) | 46%<br>(93/198) | 3e-13 |
| bacterial rhodopsin  | <i>Haloarcula vallismortis</i> | haloarch.<br>(SR)               | Q48334    | 25%<br>(38/148) | 50%<br>(74/148) | 1e-09 | 28%<br>(42/148) | 47%<br>(71/148) | 6e-10 |
| sensory rhodopsin a  | <i>Salinibacter ruber</i>      | haloarch.<br>(SR)               | YP_446609 | 26%<br>(40/149) | 44%<br>(67/149) | 6e-04 | 23%<br>(29/124) | 42%<br>(53/124) | 0.017 |
| sensory rhodopsin b  | <i>Salinibacter ruber</i>      | haloarch.<br>(SR)               | YP_446677 | 40%<br>(8/20)   | 70%<br>(14/20)  | 0.007 | 25%<br>(39/155) | 42%<br>(66/155) | 1e-04 |
| sensory rhodopsin-2  | <i>Halobacterium salinarum</i> | haloarch.<br>(SR)               | P71411    | 27%<br>(42/151) | 48%<br>(73/151) | 3e-09 | 31%<br>(48/151) | 52%<br>(79/151) | 1e-12 |
| phoborhodopsin       | <i>Halobacterium</i> sp.       | haloarch.<br>(SR)               | BAB86796  | 32%<br>(12/37)  | 56%<br>(21/37)  | 0.003 | 37%<br>(14/37)  | 59%<br>(22/37)  | 3e-05 |
| sensory rhodopsin-2  | <i>Haloarcula vallismortis</i> | haloarch.<br>(SR)               | P42197    | 27%<br>(42/155) | 45%<br>(71/155) | 9e-09 | 25%<br>(40/155) | 50%<br>(79/155) | 2e-10 |
| sensory rhodopsin-2  | <i>Natronomonas pharaonis</i>  | haloarch.<br>(SR)               | P42196    | 25%<br>(35/140) | 46%<br>(65/140) | 9e-06 | 26%<br>(38/146) | 45%<br>(67/146) | 2e-07 |
| bacteriorhodopsin II | <i>Haloquadratum walsbyi</i>   | haloarch.<br>(H <sup>+</sup> )  | YP_656804 | 25%<br>(41/158) | 43%<br>(69/158) | 4e-07 | 22%<br>(37/162) | 46%<br>(75/162) | 1e-07 |
| bacteriorhodopsin I  | <i>Haloquadratum walsbyi</i>   | haloarch.<br>(H <sup>+</sup> )  | YP_656801 | 31%<br>(46/148) | 47%<br>(71/148) | 4e-11 | 27%<br>(43/158) | 49%<br>(78/158) | 5e-11 |
| bacteriorhodopsin    | <i>Haloarcula marismortui</i>  | haloarch.<br>(H <sup>+</sup> )  | YP_136594 | 32%<br>(47/144) | 48%<br>(70/144) | 3e-09 | 28%<br>(46/164) | 43%<br>(71/164) | 3e-08 |
| bacteriorhodopsin    | <i>Halobacterium salinarum</i> | haloarch.<br>(H <sup>+</sup> )  | P02945    | 20%<br>(35/168) | 35%<br>(60/168) | 2e-04 | 20%<br>(36/174) | 37%<br>(65/174) | 3e-05 |
| archaerhodopsin-2    | <i>Halobacterium</i> sp.       | haloarch.<br>(H <sup>+</sup> )  | P29563    | 26%<br>(42/159) | 45%<br>(73/159) | 8e-06 | 27%<br>(12/43)  | 60%<br>(26/43)  | 0.002 |
| archaerhodopsin-2    | <i>Halorubrum sodomense</i>    | haloarch.<br>(H <sup>+</sup> )  | P96787    | 27%<br>(41/151) | 46%<br>(70/151) | 3e-05 | 28%<br>(13/46)  | 58%<br>(27/46)  | 9e-04 |
| archaerhodopsin-1    | <i>Halobacterium</i> sp.       | haloarch.<br>(H <sup>+</sup> )  | J05165    | 26%<br>(40/151) | 46%<br>(70/151) | 5e-05 | 28%<br>(13/46)  | 58%<br>(27/46)  | 8e-04 |
| archaerhodopsin      | <i>Halorubrum xinjiangense</i> | haloarch.<br>(H <sup>+</sup> )  | AAS15567  | 26%<br>(40/151) | 46%<br>(70/151) | 6e-05 | 28%<br>(13/46)  | 58%<br>(27/46)  | 0.001 |
| bacteriorhodopsin    | <i>Halobiforma lacisalsi</i>   | haloarch.<br>(H <sup>+</sup> )  | AAU04564  | 42%<br>(6/14)   | 64%<br>(9/14)   | 0.006 | 28%<br>(45/156) | 46%<br>(73/156) | 6e-05 |
| bacteriorhodopsin    | <i>Haloterrigena</i> sp.       | haloarch.<br>(H <sup>+</sup> )  | O93740    | 32%<br>(50/156) | 48%<br>(76/156) | 2e-07 | 29%<br>(47/157) | 49%<br>(78/157) | 2e-07 |

|                   |                                |                                |           |                 |                 |       |                 |                 |       |
|-------------------|--------------------------------|--------------------------------|-----------|-----------------|-----------------|-------|-----------------|-----------------|-------|
| cruxrhodopsin-2   | <i>Haloarcula</i> sp.          | haloarch.<br>(H <sup>+</sup> ) | AAB32951  | 38%<br>(17/44)  | 59%<br>(26/44)  | 3e-05 | 34%<br>(16/46)  | 60%<br>(28/46)  | 5e-05 |
| bacteriorhodopsin | <i>Haloarcula marismortui</i>  | haloarch.<br>(H <sup>+</sup> ) | YP_137573 | 25%<br>(38/152) | 45%<br>(69/152) | 7e-05 | 22%<br>(46/206) | 44%<br>(92/206) | 1e-06 |
| cruxrhodopsin     | <i>Haloarcula japonica</i>     | haloarch.<br>(H <sup>+</sup> ) | BAA81816  | 37%<br>(16/43)  | 60%<br>(26/43)  | 1e-04 | 24%<br>(37/152) | 45%<br>(69/152) | 1e-05 |
| cruxrhodopsin-3   | <i>Haloarcula vallismortis</i> | haloarch.<br>(H <sup>+</sup> ) | P94854    | 37%<br>(16/43)  | 62%<br>(27/43)  | 4e-05 | 24%<br>(37/152) | 46%<br>(70/152) | 7e-06 |

\* The number of identical or similar amino acid residues as well as the total number of residues is given in parentheses.

haloarch., haloarchaea; SR, sensory rhodopsin; Cl<sup>-</sup>, chloride pump; H<sup>+</sup>, proton pump.

> VChr1/V.c.

YCEGWLWVVFALSVACLGWYAYQAWRATCGWEEVYVALIEMMKSIIEAFHEFDSPATLWL  
SSGNQVVMRYGEWLLTCPVLLIHLSNLTDSKRTMGLLVSDVGCIVWGATSAMCTGWTI  
LFFLLISLSYGMITYFLVRVMAWTFVAVGMFPVLFLLGTEGFGHISPYGSAIGHSILDLI  
AKNMWGVLYLR

> VChr2/V.c.

FCMKWLWAAFALSVIILIIYYAYATWRRTTCGWEEVYVCCVELTKVVIIEFFHEFDEPGMLYL  
ANGNRVLWLRYPGEWLLTCPVILIHLSNLTDSKRTMRLLVSDVGTIVWGATAAMSTGYIV  
IFFLLGCMYGANTFFLVRAMAWLFFVSWGMFPVLFLLGPEGFGHLSVYGSTIGHTIIDLL  
SKNCWGLLFLR

> Chr1/C.r.

FCLAWLWITFALSALCLMFYGYQTKWSTCGWEEIYVATIEMIKFIIIEYFHEFDEPAVIYS  
SNGNKTVWLRYPGEWLLTCPVILIHLSNLTDSKRTMGLLVSDIGTIVWGTTAALSKGYVV  
IFFLMGLCYGIYTFVLVRYLAWLYFCSWAMFPVLFLLGPEGFGHINQFNSAIAHAAILDLA  
SKNAWSMMFLR

> Chr2/C.r.

YCAGWIWLAAGFSILLLMFYAYQTKWSTCGWEEIYVCAIEMVKVILEFFFEFKNPSMLYL  
ATGHRVQWLRYPGEWLLTCPVILIHLSNLTDSRRTMGLLVSDIGTIVWGATSAMATGYVV  
IFFCLGLCYGANTFFVVTGMAWLFFVSWGMFPILFILGPEGFGVLSVYGSTVGHTIIDLM  
SKNCWGLLYLR

> Br/G.v.

SVSDSLSFAlAAMFASALFFFS-AQALVGQRYRLALLVSAIVVSIYHYFRIFNSAAYVLE  
NGVKFNDAIRYVDWLLTVPLLLVETVAVLKEARPLLKLTVASVLMIAATGYPGEISDDITI  
IWGTVSTIPFAYILYLVRNMRWLLLLLSWGVYPIAYLLPMLGSGTSAAVGVQVGYTIADVL  
AKPVFGLLVF-

> Ops2/G.t.

SGAIFDVLAWIALLFTALFMAFKAVNA-DPVVRKFYYINAFVCGVFSYFAMISGMGWETI  
MGCRCMFYVRYIDWFITTPMLILNIGLLAGEEQWMIAMGADMGMIFAGYMGVSVALVPTW  
LWFVIGLVVYIPVVILYGVKVSLLTVVSWSVYPFVWLLSV-GTGGLGVS AESILYALLDVT  
SKCFFSFM---

> Ops1/G.t.

TGVGALTITFLILAVST--IIFITRVGPATSQKVYYCYNVFCGLMSYFAMLSGQGWTAV  
AGCRQFFYARYVDWTITTALIILELGLIAGAEPALIGVMGADVIMIVGGYLGTVSIVTTW  
FWFVISMALFVVVLYVYGRWLAWLTIVSWIFYPVVWLF-SDGFASFSVSFEVCAYSILDIA  
SKAIFGFMVMS

> Ops/Cry.sp.

TGIGGLTLGFLALTVTTVVMVAKAANA-DPERRKYYFCNTFICGIFAYFAMLSGQGTAI  
SGCRQFFYAHYVDWLLTTPLIILNLGLIAGQDYVTIAVCGADVLMIIISGYMASVSVVTTW  
FWYLFGIGMFLPIIYLYGKVAWLTIIIWCFYPIVWLF-SQGFASFSVSFETVAITIMDVI  
AKCVFSFMIIA

> Nop-1/N.c.

PTPTEYWVTFALMVLSSGIFALLSWNVPTSK-RLFHVITTLITVVLSYFAMATG-HATTF  
NCDRQVFWGRYVDWALTTPLLLLELCLLAGVDGAHTMAIVADVIMVLCGLFAALGEGGNW  
GWYTI GCFSYL FVIWLF TGLAVFALLLWTAYPIIW--GIAGARRTNVDTEIL IYTVLDLL  
AKPVFGFWLLL

> Hop/S.r.

ALASSIYVNIALAGLTIIVIAVMSRSIHDSRAKLITMSTLMISVVSSYMGLASGIDPLVM  
PEGVLSLWGRYLTWAFSTPFILLALGLLARSTTDKISAIVLDVFMCLTGLAAALTTSSH  
LWYALSTAFFVGVLYIFSTLQWMTIVLWIGYPVVWALGNEGLALLEVGATSWAYSGLDIF  
AKYAFTIILVL

> ChoP3/Ha.v.

LLNSSLWVNIALAGVVILLFVAMGRELESSRAKLIWVATMLVPLVSSYAGLASGVGFLQM  
PPGVLSPWGRYLTWTFSTPMILLALGLLADTDMASLTAITMDIGMCITGLAAALVTSSH  
VFYGISCAFFIAVLYIFGTLKLLTVVLWLGYPILWALGSEGVALLSVGVTSWGYSGLDIL  
AKYVFAFLLLR

> Hop/H.m.

LLNSSIWNIALAGVVILLFVAMGRDLESRAKLIWVATMLVPLVSSYAGLASGVGFLQM  
PPGVLSPWGRYLTWTFSTPMILLALGLLADTDIASLTAITMDIGMCVTGLAAALITSSH  
VFYGISCAFFVAVLYIFGTLKILTIVVLWLGYPILWALGSEGVALLSVGVTSWGYSGLDIL  
AKYVFAFLLLR

> Hop/N.p.

LLASSLYINIALAGLSILLFVFMTRGLDDPRAKLIHAVSTILVPVVASYTGLASGISVLEM  
PAGVVMTWGRYLTWALSTPMILLALGLLAGSNATKLTAITFDIAMCVTGLAAALTTSSHW  
FWYAI SCACFLVVLVYMFNTLKLTTVVMWLGYPVWALGVEGIAVLPVGVTSWGYSFLDIV  
AKYIFAFLLLN

> Hop/H.sp.

LLASSLWINIALAGLSILLFVYMGRNVEDPRAQLIFVATLMVPLVSSYTGLVSGVSFLEM  
PAGVLTWPGRYLTWALSTPMILIAVGLLAGSNNTTKLTAVVADIGMCVTGLAAALTTSSYW  
VWYAI SCAFFVVVLYIFNTLKVLTVVWLWLGYPVWALGAEGLAVLDVAITSWAYS GM DIV  
AKYLF AFLLLR

> Hop/Hr.sod.

LLASSLWINIALAGLSILLFVYMGRNLEDPRAQLIFVATLMVPLVSSYTGLVSGVSFLEM  
PAGVLTWPGRYLTWALSTPMILVALGLLAGSNATKLTAVTADIGMCVTGLAAALTTSSYW  
VWYVISCAFFVVVLYIFNTLKLTTVVLWLGYPVWALGAEGLAVLDVAITSWAYS GM DIV  
AKYLF AFLLLR

> Hopa/Ht.sp.

LLHSSLWVNIALAGLSILVFLYMARTVRANRRLIVGATLMIPLVSSYLGLVTGAGPIEM  
PAAVLSQWGRYLTWTLSTPMILLALGWLAEVDTADLVVIAADIGMCLTGLAAALTTSSYW  
AFYLVSTAFFVVVLYIFGTLRWLTVILWLGYPILWALGVEGFALVSVGLTSWGYSLLDIG  
AKYLF AALLLR

> Hopb/Ht.sp.

LLHSSLWVNIALAGLSILVFLYMARTVRANRRLIVGATLMIPLVSSYLGLVTGAGPIEM  
PAAVLSQWGRYLTWTLSTPMILLALGWLAEVDTADLVVIAADIGMCLTGLAAALTTSSYW  
AFYLVSTAFFVVVLYIFGTLRWLTVILWLGYPILWALGVEGFALVSVGLTSWGYSLLDIG  
AKYLF AALLLR

> Hop/H.s.

LLSSSLWVNVALAGIAILVFMGRITIRPGRPRLIWGATLMIPLVSSYLGLLSGVGMIE  
PAGVRSQWGRYLTWALSTPMILLALGLLADVDLGS LTVIAADIGMCVTGLAAAMTT SALW  
AFYAI SCAFFVVVLSIFDTRLRVLTVVWLWLGYPVWAVGVEGLALVSVGVTSWAYS VLDV F  
AKYVFAFILLR

> Hop/H.w.

LLSSSLWVNIALAGLSILLFVYMG RNITSGRARLIWGATLMIPLVSSYLGLASGVGFIEM  
PAGVMSQWGRYLTWALSTPMILLALGVLADVDRGSLTVIAADIGMCVTGLGAALITSSYW  
AFYIISCTFFVVVLFIFSTLRLLTVVVLWIGYPVIWAAGVEGFALISVGLTSWGYSGLDIL  
AKYA F S F L L L R

> Br/N.sp.

LESLLHWIYVAGMTIGALHFWSLSRNPRGVPQYEYLVA-MFIPIWLAYMAMAIDQGKVEA  
AGQ-IAHYARYIDWMVTTPLLLLSLSWTAKKDWTLIFLMSTQIVVITSGLIADLSERDWY  
LWYICGVCAFLIILWLVDKLVTYFTVLWIGYPVWIIGPSGFGWINQTIDTFLFCLLPFF  
SKVGF S F L D L H

> Xop2/H.m.

QEI VWY GAGAGAFFVSAVVFVWFAATRGNIRSSFY YL P P I H T S - V A A Y V A M A L - I A G G Q L  
GDTVSITTLRFADWIVSTPIITYYLARLAGVDTQTRLAVAANVVMIGVGYGFVMSGSLW  
IAFAVSTVAFIGLLYLFQSLRDLTVVWTSLYPVVYFLGPLGTGIIQAPDLNFLVAVLDTI  
AKVGFMSILLV

> Sop1/H.sp.

AVSAAYWIAAVAFVLVGLGITAALYAKLGESEDRGRLAALAVIPGFLAYAGMALGIGTVTV  
NGA-ELVGLRYVDWIVTTPLLVGFIGYVAGASRRRAIGVMLADALMIAFGAGAVVTGGTLW  
VLFVGVSSIFHVTLFALFSLKNHVGLLWLAYPFVWLMGPAGIGFTTGAVGAALTYAFLDVL  
AKVPYVYFFYA

> Sop/Hr.sod.

AVTSAYWLA AVAF L I G V G I T A A L Y A K L E G S R A R T R L A A L A V I P G F L S Y V G M A L G I G T V T V  
NGA-ELVGLRYVDWVVTTPLLVGFIGNAGASRRRAIGVMIADALMIVFGAAAVVSGGTLW  
ALFGVSALFHVSLFALFSLKNHVGLLWLAYPFVWLMGPAGIGFTTGAVGAALTYAFLDVL  
AKVPYVYFFYA

> Sop1/H.s.

AVATAYLGGAVALIVGVA F V W L L Y R S L D G S P H Q S A L A P L A I I P V F L S Y V G M A Y D I G T V I V  
NGN-QIVGLRYIDWLVTTPILVGYVGYAAGASRRSIGVMVADALMIAVGAGAVVTDGTLW  
ALFGVSSIFHLSLFALFNLLKNHIGLLWLAYPLVWLFPGPAGIGEATAAGVALTYVFLDVL  
AKVPYVYFFYA

> Csr3/Ha.v.

AVAVVYGITAAGFAVGVAIVGYLYASLEGSEERSILAALALIPGFISYVAMAFGIGTVTI  
GET-TLVGFRYLDWVVTTPLLVGVGYAAGASRRAIGVMVADALMILTGVGAVVADGTLW  
VLFVSTVHVSLFALFSLKNHIGLLWIAVPLVWLAGPEGLGLATYVGVSITYAFLDLL  
AKVPYVYFFYA

> Sria/S.r.

PITIVYIIGTLGMLVGI----PPALSLVGDEVGLDFDYVWAI PGIFMYLLMTFDVGSVQF  
QGY-HVPIPRYIDWALTTPLLVGYTAYIAGASRGMIGTALADFMIVFGLGAVVFSSTAW  
VFFGLSSACHLTLLALARLLLNYVGLLWLAYPLVWLFGP-GLQWVDAAGIAV IISYLDVT  
AKVPFVYFIYR

> Srib/S.r.

ATTIVLMLGTAGMLFGI----PPCLRLLDMEADGHFGYLLLI PGFLMYALMTFGVGTQTF  
QOQ-TVPLRLRYLDWLVTTPIMIGYAAVAGTSKRGIGAAALVDAVMIGLGTAAVVTAPPTW  
IFFGLAALCHLVLLGLARLLVNHTGLLWITYPVVWVFGP-GLQLISATGVSIMIMYMDVL  
AKVPFVYFVYR

> BopII/H.w.

SEATWLWIGTIGMVLGTVYFAVRGRGSTDPEQQTYIIITTLIPAI AAYLAMATGLGVISM  
PIRIDIWARYADWLLTTPLLIIDLALVAGARKQTLKLI IIDAIMILGGLAGSMMQQGAI  
VWWAVSTA AFIILLYVFNRLRNITLGLWALYPIVWILGTGGFGIIAVTTEIMLYVMLDIG  
TKIGFGAVLLE

> BopI/H.w.

GEGIWLALGTIGMLLGMVYFIADGLDVQDPRQKEFYVITILIPAIASYLSMFFGFGLTEV  
SLAVDVYWARYADWLFTTPLLLLDIGLLAGASQRDIALVGIDAFMIVTGLVATLTKVVVY  
AFWTISTISMVFLLYTFNALRNIILVTWAIYPVAWLVGTEGLALTGLYGETLLFMVLDLV  
AKVGFGFILLR

> Xop1/H.m.

GEGIWLALGTIVGMLLGMVYFMAKGDVQDPEQEEFYVITILIAGISSYLSMFFGFGLTEV  
ELVIDVYWARYADWLFTTPLLLLDIGLLAGASNRDMSLITIDAFMIVTGLAATLMKVPVY  
AFWTISTIAMFLVLYTFNVLNRNIILVAWAIYPVAWLVGTEGLGLVGLFGETLLFMILDLT  
AKIGFGFILLR

> Bop/H.s.

PEWIWLALGTALMGLGTLYFLVKGMGVSDPDAKKFYAITTLVPAITMYLSMLLGYGLTMV  
PFGNPIYWARYADWLFTTPLLLLDLALLVDADQGTIALVGADGIMIGTGLVGALTKVYSF  
VWWAISTAAMLYILYTFKVLNRNVTVVLWSAYPVVWLVIGSEGAGIVPLNIETLLFMVLDVS  
AKVGFGLILLR

> Ar2/H.sp.

PETLWLGIGTLLMLIGTFYFIARGWGVTDKEAREYYAITILVPGIAAYLAMFFGIGVTEV  
ELALDIYYARYADWLFTTPLLLLDLALLAKVDRVTITLIGVDALMIVTGLIGALSHTPLY  
TWWLFSTICIAFLVLYTFNTLTALVAVLWTAYPILWIVGTEGAGVVGLGIETLLFMVLDVT  
AKVGFVGLLLR

> Ar3/Hr.sod.

PETLWLGIGTLLMLIGTFYFLVRGWGVTDKDAREYYAVTILVPGIAAYLSMFFGIGLTEV  
TVGLDIYYARYADWLFTTPLLLLDLALLAKVDRVTITLVGVDALMIVTGLIGALSHTAIY  
SWWLFSTICMIVVLYTFNTLTALVVLVLTAYPILWIIIGTEGAGVVGLGIETLLFMVLDVT  
AKVGFVGLLLR

> Ar1/H.sp.

PETLWLGIGTLLMLIGTFYFIVKGWGVTDKEAREYYISITILVPGIAAYLSMFFGIGLTEV  
QVGLDIYYARYADWLFTTPLLLLDLALLAKVDRVSITLVGVDALMIVTGLVGALSHTPLY  
TWWLFSTICMIVVLYTFNTLTALVVLVLTAYPILWIIIGTEGAGVVGLGIETLLFMVLDVT  
AKVGFVGLLLR

> Aop/H.x., Aopbd1\_H.x.

PETLWLGIGTLLMLIGTFYFIVKGWGVTDKEAREYYISITILVPGIAAYLSMFFGIGLTEV  
QVGLDIYYARYADWLFTTPLLLLDLALLAKVDRVSITLVGVDALMIVTGLIGALSHTPLY  
TWWLFSTICMIVVLYTFNTLTALVVLVLTAYPILWIVGTEGAGVVGLGIETLLFMVLDVT  
AKVGFVGLLLR

> Br/H.l.

PESLWLWVGTIGMTLGTLYFLGRGRGVDRPKMQQFYIITIFVTTIAMYFAMATGFVTEV  
TVGLTIYWARYADWIFTTPLLLLDLALLAGANRNTITLLGLDVFMIGTGTIAAFAATPGI  
AWWGISTGALLVLLYLSTLRNLLIVLWLLYPVVWILGTEGFGILPLYWETAAFMILDLS  
AKVGFVGLLLR



> Bop/Ht.sp.

PESIWLWIGTIGMTLGTLYFVGRGRGVRDRKMQEFYIITIFITTIAMYFAMATGFGVTEV  
MVGLTIYWARYADWLFTTPLLDDLSLLAGANRNTITLIGLDVFMIGTGAIAALSSTPGI  
AWWAISTGALLALLYLFGRLRNLVIALWFLYPVVWILGTEGFGILPLYWETAAFMVLDDL  
AKVGFVILLQ

> Cop2/H.sp.

GESIFLWGTAGMFLGMLYFIARGWSVSDQRRQKFYIATIMIAAIVNYLSMALGFGVTTI  
ELGRAIYWARYTDWLFTTPLLDDLAGADRNTISLVGLDVLMI GTGALATLSAGSGL  
VWWGISTGFLLVLLYKFSTLRNLVVLVWLVYPVWLVGTEGLGLVGLPIETA AFMVLDLT  
AKIGFGIILLQ

> Bop/H.m.

SEGIWLWLGTAGMFLGMLYFIARGWGETDGRRQKFYIATILITAI VNYLAMALGFGLTFI  
EFGHPIYWARYTDWLFTTPLLDDLAGADRNTISLVSLDVLMI GTGVVATLSAGSGL  
VWWGISTAFLLVLLYTFKTLRNLVTVVWLVYPVWLVGSEGLGLVGI GIETAGFMVIDLV  
AKVGFGIILLR

> Cop/H.j.

SEAIWLWLGTAGMFLGMLYFIGRGWGETDSRRQKFYIATILITAI VNYLAMALGFGLTIV  
EFAHPIYWARYSDWLFTTPLLDDLAGADRNTISLVSLDVLMI GTGLVATLSAGSGL  
VWWGISTAFLLVLLYTFKTLRNLVTVVWLVYPVWVLIGTEGLGLVGI GIETAGFMVIDLT  
AKVGFGIILLR

> Cop3/Ha.v.

GEAIWLWLGTAGMFLGMLYFIARGWGETDSRRQKFYIATILITAI VNYLAMALGFGLTIV  
EIARPIYWARYSDWLFTTPLLDDLAGADRNTISLVSLDVLMI GTGLVATLSAGSGL  
VWWGISTAFLLVLLYTFKTLRNLVTVVWLVYPVWVLIGTEGLGLVGI GIETAGFMVIDLV  
AKVGFGIILLR

> Sop2/H.s.

ALTTWFVWGAVGMLAGTVLPI--RDCIRHPSHRRYDLVLAGITGLIAYTTMGLGITATTV  
GDR-TVYLARYIDWLVTPLIVLYLAMLARPGHRTSWLLAADVFVIAAGIAAALTTGVQW  
LFFAVGAAGYAALLYL FVTLRNLITVVLWTLYPVWVLLSPAGIGILQTEMYTIVVVYLDFI  
SKVAFVAFVAVL

> Pr/H.sp.

DTTVWAWIGALAMGAGTLWAWLSGSSATDESHGVYYGTLAGVTGVLAYLAMALGVGTLST  
AAG-ELEVRYVDWLVTPLILLYLGLLARPSRRVLGLIGVDVVVIAGGVTGAATGGAVW  
AAFAVGGGAYLALVYVFGTLRNITVVLWTLYPVVRLLAPTGFGLLTSATEMLVFVYLDIV  
SKVGFVVIAVA

> Sop2/Ha.v.

TITTWFTLGLLGELLGTAVLAY-GYTLVPEETRKRYLLLLIAIPGIVAYALMALGFGSIQS  
EGH-AVYVRYVDWLLTTPLNWFLALLAGASREDTKLVVLQALTIVFGFAGAVTPSPVY  
ALFAVGGALFGGVIYLYRTLRFVVLWLVYPVVWLLGAAGVGLMDVETATLVVVYLDV  
TKVGFVVIALL

> Sop2/N.p.

GLTTLFWLGAIGMLVGTLAFWAGRDAGSGERR-YYVTLVGI SGIVAYVVMALGVGWVVP  
AER-TVFAPRYIDWILTTPPLIVYFLGLLAGLDSREFIVITLNTVVMLAGFAGAMVPGIEY  
ALFGMGAVAFGLVYLYVRLRNLTVILWAIYPIFWLLGPPGVALLTPTVDVALIVYLDLV  
TKVGFVFIALL

**Supplemental Data Set S1.** Trimmed sequences of 45 rhodopsin-related proteins from green algae, fungi, cyanobacteria, cryptomonads, and halobacteria corresponding to the alignment in Supplemental Figure S6.

Source organisms: VChR1/V.c., channelrhodopsin-1, *Volvox carteri*, VChR2/V.c., channelrhodopsin-2, *Volvox carteri*, ChR1/C.r., channelrhodopsin-1, *Chlamydomonas reinhardtii*, ChR2/C.r., channelrhodopsin-2, *Chlamydomonas reinhardtii*, Br/G.v., bacterioopsin, *Gloeobacter violaceus*, Ops2/G.t., opsin-2, *Guillardia theta*, Ops1/G.t., opsin-1, *Guillardia theta*, Ops/Cry.sp., opsin, *Cryptomonas* sp.; Nop-1/N.c., opsin-1, *Neurospora crassa*, Hop/S.r., halorhodopsin, *Salinibacter ruber*, ChoP3/Ha.v., cruxhalorhodopsin-3, *Haloarcula vallismortis*, Hop/H.m., halorhodopsin, *Haloarcula marismortui*, Hop/N.p., halorhodopsin, *Natronomonas pharaonis*, Hop/H.sp., halorhodopsin, *Halobacterium* sp.; Hop/Hr.sod., halorhodopsin, *Halorubrum sodomense*, Hopa/Ht.sp., halorhodopsin, *Haloterrigena* sp.; Hopb/Ht.sp., halorhodopsin, *Haloterrigena* sp.; Hop/H.s., halorhodopsin, *Halobacterium salinarum*, Hop/H.w., halorhodopsin, *Haloquadratum walsbyi*, Br/N.sp., bacteriorhodopsin, *Nostoc* sp.; Xop2/H.m., opsin, *Haloarcula marismortui*, Sop1/H.sp., sensory rhodopsin-1, *Halobacterium* sp.; Sop/Hr.sod., rhodopsin, *Halorubrum sodomense*, Sop1/H.s., sensory

rhodopsin-1, *Halobacterium salinarum*, Csr3/Ha.v., bacterial rhodopsin, *Haloarcula vallismortis*, Sria/S.r., sensory rhodopsin a, *Salinibacter ruber*, Srib/S.r., sensory rhodopsin b, *Salinibacter ruber*, BopII/H.w., bacteriorhodopsin II, *Haloquadratum walsbyi*, BopI/H.w., bacteriorhodopsin I, *Haloquadratum walsbyi*, Xop1/H.m., bacteriorhodopsin, *Haloarcula marismortui*, Bop/H.s., bacteriorhodopsin, *Halobacterium salinarum*, Ar2/H.sp., archaerhodopsin-2, *Halobacterium* sp.; Ar3/Hr.sod., archaerhodopsin-2, *Halorubrum sodomense*, Ar1/H.sp., archaerhodopsin-1, *Halobacterium* sp.; Aop/H.x., archaerhodopsin, *Halorubrum xinjiangense*, Br/H.l., bacteriorhodopsin, *Halobiforma lacisalsi*, Bop/Ht.sp., bacteriorhodopsin, *Haloterrigena* sp.; Cop2/H.sp., cruxrhodopsin-2, *Haloarcula* sp.; Bop/H.m., bacteriorhodopsin, *Haloarcula marismortui*, Cop/H.j., cruxrhodopsin, *Haloarcula japonica*, Cop3/Ha.v., cruxrhodopsin-3, *Haloarcula vallismortis*, Sop2/H.s., sensory rhodopsin-2, *Halobacterium salinarum*, Pr/H.sp., phoborhodopsin, *Halobacterium* sp.; Sop2/Ha.v., sensory rhodopsin-2, *Haloarcula vallismortis*, Sop2/N.p., sensory rhodopsin-2, *Natronomonas pharaonis*.
